# Supplementary material for: Tracking temporal shifts in area, biomes, and pollinators in the radiation of Salvia (sages) across continents: leveraging anchored hybrid enrichment and targeted sequence data
Source: PubMed Central journal article supplement — Am J Bot. 2019 Apr 15;106(4):573–97. doi: 10.1002/ajb2.1268 (PMC6850103; doi:10.1002/ajb2.1268), 2019-04-15
Supplement: AJB2-106-573-s001.pdf [file AJB2-106-573-s001.pdf]

**Appendix S1.** Species names and GenBank information for nrDNA data (ETS and ITS). Species

with \*\*\* were sampled for AHE and the data are deposited in data available from the Dryad

Digital Repository: <https://doi.org/10.5061/dryad.8m40rb0>

*Agstache pallida* (Lindl.) Cory, -, -, \*\*\* ; *Lepechinia calycina* (Benth.) Epling, KF307474, JF301344; *Lepechinia caulescens* (Ortega) Epling, KF307475, KF307440; *Lepechinia chamaedryoides* (Balb.) Epling, MK425848, MK425903, \*\*\*; *Lepechinia lamiiifolia* (Benth.) Epling, JF301320, JF301348; *Lepechinia leucophylloides* (Ramamoorthy, Hiriart & Medrano) B.T. Drew, Cacho & Sytsma, MK425849, MK425904, \*\*\*; *Lepechinia mexicana* (S.Schauer) Epling, JF301322, JF301350; *Lepechinia radula* (Benth.) Epling, KF307487, KF307452; *Melissa axillaris* (Benth.) Bakh.f., JQ669189, JQ669114; *Melissa officinalis* L., MK425850, MK425905, \*\*\*; *Prunella vulgaris* L., -, -, \*\*\* ; *Salvia absconditiflora* Greuter & Burdet, -, KU563839; *Salvia acerifolia* B.L.Turner, -, MF664540; *Salvia adenocaulon* P.H.Davis, -, KU563828; *Salvia adenophora* Fernald, -, MF622100; *Salvia adenophylla* Hedge & Hub.-Mor., -, KU563789; *Salvia aegyptiaca* L., KJ584254, DQ667285; *Salvia aequidistans* Fernald, -, MF622101; *Salvia aerea* H. Lév., MG824294, MG824166; *Salvia aethiopsis* L., -, KJ584163; *Salvia africana-caerulea* L., MK425851, MK425906, \*\*\*; *Salvia africana-lutea* L., KJ584256, -; *Salvia agnes* Kunth, -, MF622102; *Salvia akiensis* Benth., LC060826, LC060728; *Salvia alamosana* Rose, -, MF622103; *Salvia alba* J.R.I.Wood, -, MF664543; *Salvia albicaulis* Benth., KJ584257, KJ584206; *Salvia albimaculata* Hedge & Hub.-Mor., -, KU563790; *Salvia albocaerulea* Linden, -, MF622104; *Salvia alborosea* Epling & Játiva, -, MF622105; *Salvia amarissima* Cav., -, MF622106; *Salvia amethystina* Sm., -, MF664545; *Salvia amplexicaulis* Lam., MG824296, KU563829; *Salvia amplifrons* Briq., -, MF622107; *Salvia anatolica* Hamzaoglu & A.Duran, -, KU563840; *Salvia angulata* Benth., -, MF622108; *Salvia angustiarum* Epling, MK425852, MF622109; *Salvia apiana* Jeps., KP852936, DQ667214; *Salvia appendiculata* E.Peter, MG824297, MG824169; *Salvia aramiensis* Rech.f., -, KU563791; *Salvia arbuscula* Fernald, -, HQ418846; *Salvia areolata* Epling, -, MF622110; *Salvia areysiana* Deflers, KJ584259, -; *Salvia argentea* L., -, KJ584164; *Salvia Ariana* Hedge, -, KU563843; *Salvia arisanensis* Makino ex Hayata, LC060827, AB295100; *Salvia aristata* Aucher ex Benth., JF301336, DQ667280; *Salvia articulata* Epling, -, MF622111; *Salvia aspera* M.Martens & Galeotti, -, HQ418847; *Salvia atrocyanea* Epling, -, MF622112; *Salvia atropatana* Bunge, -, KU563841; *Salvia atropurpurea* C.Y.Wu, MG824298, MG824170; *Salvia atrorubra* C.Y.Wu, MG824299, MG824171; *Salvia aucheri* Benth., -, KJ584193; *Salvia aurita* L.f., KJ584260, KJ584218; *Salvia austriaca* Jacq., MK425853, MK425907, \*\*\*; *Salvia axillaris* Moc. & Sessé ex Benth., MK425854, MK425908, \*\*\*; *Salvia azurea* Michx. ex Vahl, MK425855, MK425909, \*\*\*; *Salvia baimaensis* S.W.Su & Z.A.Shen, MG824300, JQ934103; *Salvia ballotaeflora* Benth., -, AY570396; *Salvia ballsiana* (Rech.f.) Hedge, -, KU563792; *Salvia bangii* (Rusby) J.R.I.Wood, -, DQ667263; *Salvia bariensis* Thulin, KJ584262, -; *Salvia betulifolia* Epling, MK425856, MF622113; *Salvia bifidocalyx* C.Y.Wu & Y.C.Huang, MG824301, MG824173; *Salvia blepharochlaena* Hedge & Hub.-Mor., -, KU563793; *Salvia blepharophylla* Brandegees ex Epling, -, HQ418850; *Salvia bogotensis* Benth., -;

MF664550; *Salvia bowleyana* Dunn, MG824302, JQ934104; *Salvia brachyantha* (Bordz.) Pobed., -, KU563844; *Salvia brachyloma* E.Peter, -, JQ934108; *Salvia brandegeei* Munz, KP852949, KP852784; *Salvia breviflora* Moc. & Sessé ex Benth., -, MF664551; *Salvia brevilabra* Franch., -, EF373638; *Salvia brevipes* Benth., -, MF622114; *Salvia broussonetii* Benth., KJ584263, KJ584225; *Salvia bucharanii* Hedge, -, MF664553; *Salvia bucharica* Popov, -, KU563794; *Salvia bulleyana* Diels, MG824307, KU563780; *Salvia bullulata* Benth., -, MF664554; *Salvia bupleuroides* Hook. & Arn., -, MF664555; *Salvia cabulica* Benth., -, KJ584189; *Salvia cacaliifolia* Benth., MG824308, DQ667259; *Salvia cadmica* Boiss., MK425857, MK425910, \*\*\*; *Salvia caespitosa* Montbret & Aucher ex Benth., -, KU563796; *Salvia californica* Brandegee, MK425858, MK425911, \*\*\*; *Salvia calolophos* Epling, -, MF664556; *Salvia campanulata* Wall. ex Benth., MG824309, MG824181; *Salvia canariensis* L., MK425859, MK425912, \*\*\*; *Salvia candelabrum* Boiss., -, KJ584190; *Salvia candicans* M.Martens & Galeotti, -, DQ667299; *Salvia candidissima* Vahl, -, DQ667261; *Salvia cardinalis* Cav., -, Jenks et al., 2013; *Salvia carduea* Benth., KP852952, KP852785; *Salvia carnea* Kunth, MK425860, MK425913, \*\*\*; *Salvia cassia* Sam. ex Rech.f., -, KU563845; *Salvia castanea* Diels, MG824312, KU563781; *Salvia caudata* Epling, -, Jenks et al., 2013; *Salvia cavaleriei* H. Lév., MG824316, KC473232; *Salvia cedronella* Boiss., -, KU563797; *Salvia cedrosensis* Greene, KP852953, DQ667228; *Salvia cerinopruinosa* Rech.f., -, KM519758; *Salvia cerradicola* E.P.Santos, -, MF622116; *Salvia chamaedryoides* Cav., -, HQ418855; *Salvia chamelaeagnea* Berg., KJ584267, KJ584212; *Salvia chapalensis* Briq., -, MF622117; *Salvia chiapensis* Fernald, -, MF622118; *Salvia chienii* E.Peter, MG824321, JQ934113; *Salvia chinensis* Benth., MK425861, MK425914, \*\*\*; *Salvia chionantha* Boiss., -, KU563846; *Salvia chionoeplica* Epling, KP852954, DQ667227; *Salvia chionophylla* Fernald, -, MF622119; *Salvia chloroleuca* Rech.f. & Aellen, -, KU563847; *Salvia chrysophylla* Stapf, -, KU563848; *Salvia chunganensis* C.Y.Wu & Y.C.Huang, MG824324, MG824196; *Salvia cinnabarina* M.Martens & Galeotti, -, HQ418856; *Salvia clevelandii* (A.Gray) Greene, KP852955, MF664560; *Salvia clinopodioides* Kunth, -, HQ418857; *Salvia coahuilensis* Fernald, -, MF622120; *Salvia coccinea* Buc'hoz ex Etl., MG824325, EU169484; *Salvia columbariae* Benth., MK425862, MK425915, \*\*\*; *Salvia compsostachys* Epling, -, MF664562; *Salvia concolor* Lamb. ex Benth., -, HQ418858; *Salvia confertiflora* Pohl, -, HQ418859; *Salvia confertispicata* Fragoso & Mart. Gord., MK425863, MF664563; *Salvia congestiflora* Epling, -, MF664564; *Salvia connivens* Epling, -, MF664565; *Salvia corrugata* Vahl, MK425864, MK425916, \*\*\*; *Salvia cryptodonta* Fernald, -, MF664566; *Salvia cualensis* Britton & P.Wilson, MK425865, -; *Salvia cuatrecasana* Epling, -, MF622123; *Salvia curviflora* Benth., -, MF664567; *Salvia cuspidata* Ruiz & Pav., -, MF664569; *Salvia cyanescens* Boiss. & Balansa, -, KU563849; *Salvia cyanicalyx* Epling, -, MF622125; *Salvia cyclostegia* E.Peter, MG824326, EU169475; *Salvia cynica* Dunn, MG824329, KU563782; *Salvia dabieshanensis* J.Q.He, MG824330, MG824202; *Salvia daghestanica* (Sosn.) Menitsky, -, KJ584187; *Salvia densiflora* Benth., -, MF664570; *Salvia deserta* Schangin, MG824331, DQ132865; *Salvia deserti* Decne., KJ584270, -; *Salvia dianthera* (Roth ex Roem. & Schult.) Briq., JF301326, DQ667329; *Salvia dichroantha* Stapf, -, KU563830; *Salvia diegoae* Mart. Gord. & Lozada-Pérez, -, MF664571; *Salvia digitaloides* Diels, MK425866, MK425917, \*\*\*; *Salvia discolor* Kunth, -, HQ418860; *Salvia disermas* L., KJ584271, KJ584179; *Salvia disjuncta* Fernald, -, MF622126; *Salvia divinorum* Epling & Játiva, -, HQ418861; *Salvia dolomitica* Codd, KJ584273, KJ584213; *Salvia dombeyi* Epling, -, HQ418862; *Salvia dominica* L., -, KJ864961; *Salvia dorisiana* Standl., -, HQ418863; *Salvia*

*dorrii* (Kellogg) Abrams, KP852971, DQ667229; *Salvia dorystaechas* B.T. Drew, MK425867, MK425918, \*\*\*; *Salvia durifolia* Epling, -, MF664574; *Salvia elegans* Vahl, MG824334, MG824206; *Salvia engelmannii* A.Gray, -, KU563870; *Salvia eremostachya* Jeps., KP852977, DQ667232; *Salvia eriophora* Boiss. & Kotschy, -, KU563850; *Salvia erythrostoma* Epling, -, HQ418864; *Salvia euphratica* Montbret & Aucher ex Benth., -, KU563819; *Salvia evansiana* Hand.-Mazz., MG824335, JQ934120; *Salvia exserta* Griseb., -, MF622128; *Salvia farinacea* Benth., MG824337, JQ934121; *Salvia filifolia* Ramamoorthy, -, MF664576; *Salvia filipes* Benth., -, MF664577; *Salvia flaccidifolia* Fernald, -, HQ418865; *Salvia flava* Forrest ex Diels, MG824339, EF373624; *Salvia flocculosa* Benth., -, MF664578; *Salvia florida* Benth., -, MF622130; *Salvia formosa* L'Hér., -, MF622131; *Salvia forreri* Greene, -, MF622132; *Salvia frigida* Boiss., -, KU563851; *Salvia fruticosa* Mill., -, KJ584195; *Salvia fruticulosa* Benth., -, HQ418866; *Salvia fulgens* Cav., MK425868, HQ418867; *Salvia funerea* M.E.Jones, KP852980, KU563881; *Salvia gachantivana* Fern. Alonso, -, MF664580; *Salvia galloana* B.L.Turner, -, MF664581; *Salvia garipensis* E. Mey. ex Benth., -, DQ667281; *Salvia geminata* Thulin, KJ584276, -; *Salvia gesneriiflora* Lindl. & Paxton, -, MF622133; *Salvia gilliesii* (Benth.) J.R.I.Wood, -, Jenks et al., 2013; *Salvia glabrescens* Makino, -, AB295104; *Salvia glechomifolia* Kunth, -, MF622134; *Salvia glutinosa* L., KF307496, KJ584253; *Salvia gracilipes* Epling, -, MF622135; *Salvia graciliramulosa* Epling & Játiva, -, MF664582; *Salvia gravaida* Epling, -, HQ418868; *Salvia greatae* Brandegee, JF301331, HQ418869; *Salvia greggii* A.Gray, -, HQ418870; *Salvia grewiifolia* S.Moore, -, HQ418871; *Salvia guadalajarensis* Briq., -, MF664584; *Salvia guaranitica* Benth., -, KC473237; *Salvia haenkei* Benth., -, DQ667271; *Salvia handelii* E.Peter, MG824340, MG824211; *Salvia heerii* Regel, -, MF664587; *Salvia heldreichiana* Boiss., -, KU563799; *Salvia helianthemifolia* Benth., MK425869, MF664588; *Salvia henryi* A.Gray, JF301337, DQ667216; *Salvia herbacea* Benth., -, MF622136; *Salvia herbanica* A.Santos & M. Fernández, KJ584278, KJ584246; *Salvia heterochroa* E.Peter, MG824341, KJ584252; *Salvia heterofolia* Epling & Mathias, -, MF664590; *Salvia hians* Royle ex Benth., MK425870, MK425919, \*\*\*; *Salvia hidalgensis* Miranda, -, MF664591; *Salvia hierosolymitana* Boiss., MG824342, -; *Salvia hilarii* Benth., -, MF622137; *Salvia hintonii* Epling, -, MF664592; *Salvia hirtella* Vahl, -, DQ667326; *Salvia hispanica* L., -, MF664593; *Salvia holwayi* Epling, MK425871, MK425920, \*\*\*; *Salvia holwayi* 2 S.F.Blake, -, MF622138; *Salvia honania* L.H.Bailey, MG824343, MG824213; *Salvia huberi* Hedge, -, KU563800; *Salvia hupehensis* E.Peter, MG824345, MG824215; *Salvia hydrangea* DC. ex Benth., -, KP294355; *Salvia hylocharis* Diels, MG824346, MG824216; *Salvia hypargeia* Fisch. & C.A.Mey., -, KU563877; *Salvia hypoleuca* Benth., -, KU563852; *Salvia ibugana* J.G. González, -, MK425921; *Salvia inconspicua* Benth., -, DQ667298; *Salvia indica* L., -, KU563853; *Salvia infusca* Epling, -, MF622139; *Salvia interrupta* Schousb., -, KJ584191; *Salvia involucrata* Cav., -, MF622140; *Salvia iodantha* Fernald, -, MF622141; *Salvia ionocalyx* Epling, -, MF622142; *Salvia isensis* Nakai ex H.Hara, LC060831, LC060730; *Salvia Jaimehintoniana* Ramamoorthy ex B.L.Turner, -, MF622143; *Salvia japonica* Thunb., MG824347, LC060731; *Salvia jorgehintoniana* Ramamoorthy ex B.L.Turner, -, MF664596; *Salvia judaica* Boiss., MG824348, KJ584241; *Salvia jurisicii* Kosanin, -, KU563831; *Salvia karwinskii* Benth., -, MF622144; *Salvia keerlii* Benth., -, MF622145; *Salvia kiangsiensis* C.Y.Wu, MG824349, JQ934126; *Salvia kiaometiensis* H.L.\_v., MG824350, MG824220; *Salvia korolkovii* Regel & Schmalh., -, KU563801; *Salvia koyamae* Makino, MK425872, MK425922, \*\*\*; *Salvia kronenburgii* Rech.f., -, KM519759; *Salvia kurdica* Boiss. & Hohen. ex Benth., -, KU563821; *Salvia*

*lachnostachys* Benth., -, MF664598; *Salvia laevis* Benth., -, MF664599; *Salvia lanata* Bennet & Raizada, -, KU563878; *Salvia lanceolata* Lam., KJ584280, KJ584201; *Salvia langlassei* Fernald, -, MF664600; *Salvia languidula* Epling, MK425873, MF622146; *Salvia lanigera* Poir., -, KJ584185; *Salvia lankongensis* C.Y.Wu, MG824351, MG824221; *Salvia lasiantha* Benth., -, DQ667300; *Salvia lasiocephala* Hook. & Arn., -, MF664601; *Salvia lavanduloides* Kunth, -, DQ667297; *Salvia leptophylla* Jacq., -, Jenks et al., 2013; *Salvia leptostachys* Benth., -, MF664603; *Salvia leriifolia* Benth., -, KU563823; *Salvia leucantha* Cav., MG824352, MF664604; *Salvia leucocephala* Kunth, -, MF622147; *Salvia leucochlamys* Epling, -, MF622148; *Salvia leucodermis* Baker, KJ584283, KJ584220; *Salvia leucophylla* Greene, KP852982, KP852815; *Salvia liguliloba* Y.Z. Sun, MG824353, JQ934128; *Salvia limbata* C.A.Mey., -, KU563854; *Salvia lineata* Benth., -, MF622149; *Salvia littae* Vis., -, MF622150; *Salvia lobbii* Epling, -, MF622151; *Salvia longispicata* M.Martens & Galeotti, -, HQ418876; *Salvia longistyla* Benth., -, MF622152; *Salvia lophanthoides* Fernald, -, MF664607; *Salvia lutescens* (Koidz.) Koidz., LC060837, AB266243; *Salvia lycioides* A.Gray, -, MF622153; *Salvia lyrata* L., MK425874, MK425923, \*\*\*; *Salvia macrophylla* Benth., -, HQ418877; *Salvia madrensis* Seem., -, HQ418878; *Salvia mairei* H. Lév., MG824356, MG824226; *Salvia majdae* Ramamoorthy, MK425875, MK425924, \*\*\*; *Salvia manantlanensis* Ramamoorthy, MK425876, MK425925; *Salvia marashica* İlçim, Celep & Dogan, -, KU563802; *Salvia margaritae* Botsch., -, KU563880; *Salvia maximowicziana* Hemsl., KM886717, KM886750; *Salvia maymanica* Hedge, -, KU563805; *Salvia meiliensis* S.W.Su, MG824359, JQ934131; *Salvia melaleuca* Epling, -, MF664608; *Salvia melissiflora* Benth., -, MF664609; *Salvia melissodora* Lag., -, MF622154; *Salvia mellifera* Greene, KP852995, DQ667220; *Salvia merjamie* Forssk., KJ584286, KJ584184; *Salvia mexiae* Epling, MK425877, -; *Salvia mexicana* L., -, MF622155; *Salvia microphylla* Kunth, -, MF622158; *Salvia microphylla* var *neurepia* (Fernald) Epling, -, Jenks et al., 2013; *Salvia microstegia* Boiss. & Balansa, -, KJ584171; *Salvia miltiorrhiza* Bunge, MK425878, MK425926, \*\*\*; *Salvia minarum* Briq., -, MF664613; *Salvia miniata* Fernald, -, Jenks et al., 2013; *Salvia misella* Kunth, -, MF664614; *Salvia mocinoi* Benth., -, DQ667274; *Salvia modesta* Boiss., -, KU563856; *Salvia mohavensis* Greene, KP852997, KP852829; *Salvia moniliformis* Fernald, -, MF622160; *Salvia montbretii* Benth., -, KU563869; *Salvia moorcroftiana* Wall. ex Benth., -, KU563857; *Salvia muelleri* Epling, -, MF622161; *Salvia muirii* L.Bolus, KJ584288, KJ584208; *Salvia multicaulis* Vahl, -, KP294353; *Salvia munzii* Epling, KP853000, DQ667224; *Salvia muscarioides* Fernald, -, MF664616; *Salvia myriantha* Kunth, -, MF664617; *Salvia namaensis* Schinz, KJ584289, KJ584217; *Salvia nana* Kunth, -, MF664618; *Salvia nanchuanensis* H.T. Sun, MG824364, -; *Salvia napifolia* Jacq., -, KU563827; *Salvia nepetoides* Kunth, MK425879, -; *Salvia nervata* M.Martens & Galeotti, -, MF622162; *Salvia nervosa* Benth., -, MF664619; *Salvia nilotica* Juss. ex Jacq., -, KJ584229; *Salvia nipponica* Miq., LC060848, AB295103; *Salvia nitida* (M.Martens & Galeotti) Benth., -, MF664620; *Salvia nubicola* Wall. ex Sweet, MG824367, KU563786; *Salvia nutans* L., -, KU563833; *Salvia nydeggeri* Hub.-Mor., -, KU563803; *Salvia oaxacana* Fernald, MK425880, MK425927, \*\*\*; *Salvia occidentalis* Sw., -, HQ418882; *Salvia officinalis* L., MK425881, MK425928, \*\*\*; *Salvia omeiana* E.Peter, MG824369, EF373642; *Salvia omerocalyx* Hayata, LC060852, AB353205; *Salvia oppositiflora* Ruiz & Pav., -, HQ418883; *Salvia orbignaei* Benth., -, DQ667279; *Salvia ovalifolia* A.St.-Hil. ex Benth., -, DQ667315; *Salvia oxyphora* Briq., -, HQ418884; *Salvia pachyphylla* Epling ex Munz, KP853003, DQ667230; *Salvia pachystachya* Trautv., -, KU563804; *Salvia palaestina* Benth., -, KJ584175; *Salvia*

*palealis* Epling, -, MF664622; *Salvia pallida* Benth., -, MF664623; *Salvia palmeri* A.Gray, -, MF664624; *Salvia pansamalensis* Donn.Sm., -, MF622163; *Salvia paohsingensis* C.Y.Wu, MG824370, MG824239; *Salvia paramiltiorrhiza* H.W.Li & X.L.Huang, -, JQ934140; *Salvia parryi* A.Gray, -, MF622164; *Salvia patens* Cav., MK425882, MK425929, \*\*\*; *Salvia pauciserrata* Benth., -, MF664625; *Salvia peninsularis* Brandegee, -, MF622165; *Salvia pennellii* Epling, -, MF664626; *Salvia pentstemonoides* Kunth & C.D. Bouché, -, KU563871; *Salvia perlonga* Fernald, -, MF664627; *Salvia persepolitana* Boiss., -, KU563858; *Salvia personata* Epling, -, DQ667269; *Salvia petrophila* Rydb., MG824372, MG824241; *Salvia phlomoides* Asso, -, KJ584186; *Salvia pichinchensis* Benth., -, MF622166; *Salvia pinguifolia* (Fernald) Wooton & Standl., -, MF622167; *Salvia pinnata* L., -, KU563798; *Salvia pisidica* Boiss. & Heldr. ex Benth., -, KU563806; *Salvia platystoma* (Epling) J.R.I.Wood, -, DQ667277; *Salvia plebeia* R.Br., LC060858, JQ934146; *Salvia plectranthoides* Griff., MG824378, KU563787; *Salvia plurispicata* Epling, -, MF664629; *Salvia poculata* Nöbelek, -, KU563859; *Salvia podadena* Briq., MK425883, MK425930, \*\*\*; *Salvia pogonochila* Diels ex Limpr., MG824381, MG824250; *Salvia polystachya* Cav., JF301334, DQ667292; *Salvia potaninii* Krylov, MG824382, MG824251; *Salvia potentillifolia* Boiss. & Heldr. ex Benth., -, KU563807; *Salvia praeclara* Griseb., -, Jenks et al., 2013; *Salvia praestans* Epling, -, MF664632; *Salvia prasiifolia* Benth., -, MF622168; *Salvia pratensis* L., -, KJ584178; *Salvia prattii* Hemsl., MG824383, JQ934151; *Salvia procurrens* Benth., -, DQ667304; *Salvia protracta* Benth., -, MF664634; *Salvia prunelloides* Kunth, -, HQ418886; *Salvia prunifolia* Fernald, MK425884, -; *Salvia przewalskii* Maxim., MK425885, MK425931, \*\*\*; *Salvia pseudeuphratica* Rech.f., -, KM519762; *Salvia pubescens* Benth., -, DQ667296; *Salvia pulchella* DC., -, MF622169; *Salvia purpurea* Cav., -, MF622170; *Salvia purpusii* Brandegee, -, MF664637; *Salvia pusilla* Fernald, -, MF622171; *Salvia pygmaea* Matsum., LC060854, AB295098; *Salvia qimenensis* S.W.Su & J.Q.He, MG824391, JQ934155; *Salvia quercetorum* Epling, MK425886, MK425932; *Salvia quezelii* Hedge & Afzal-Rafii, -, KU563808; *Salvia radula* Benth., KJ584293, KJ584180; *Salvia ramamoorthyana* Espejo, -, MF664638; *Salvia ramosa* Brandegee, -, MF622172; *Salvia ranzaniana* Makino, LC060856, AB287375; *Salvia raymondii* J.R.I.Wood, -, MF664639; *Salvia recognita* Fisch. & C.A.Mey., -, KU563809; *Salvia recurva* Benth., -, MF622173; *Salvia reflexa* Hornem., -, MF622174; *Salvia regla* Cav., MK425887, MK425933, \*\*\*; *Salvia remota* Benth., -, Jenks et al., 2013; *Salvia repens* Burch. ex Benth., KJ584295, KJ584232; *Salvia reptans* Jacq., MK425888, MF664642; *Salvia retinervia* Briq., -, HQ418888; *Salvia reuteriana* Boiss., -, MF289973; *Salvia rhombifolia* Ruiz & Pav., -, MF622177; *Salvia rhyacophila* (Fernald) Epling, -, MF664643; *Salvia rhytidea* Benth., -, KU563861; *Salvia richardsonii* B.L.Turner, -, MF664644; *Salvia ringens* Sm., -, KU563810; *Salvia roborowskii* Maxim., MG824394, EF373630; *Salvia roemeriana* Scheele, JF301340, DQ667211; *Salvia rosei* Fernald, -, MF664645; *Salvia rosmarinus* L., MK425889, MK425934, \*\*\*; *Salvia rostellata* Epling, MK425890, -; *Salvia rubescens* Kunth, -, MF622178; *Salvia rubiginosa* Benth., -, MF664646; *Salvia rufula* Kunth, -, MF622179; *Salvia rupicola* Fernald, -, MF664647; *Salvia rusbyi* Britton ex Rusby, -, DQ667278; *Salvia russellii* Benth., -, KU563824; *Salvia rypara* Briq., -, DQ667266; *Salvia rzedowskii* Ramamoorthy, -, MF664650; *Salvia sagittata* Ruiz & Pav., -, MF622180; *Salvia sahendica* Boiss. & Buhse, -, KU563778; *Salvia sanctaeluciae* Seem., MK425891, MK425935; *Salvia santanae* Ramamoorthy ex J.G. González & Guzm.-Hern., MK425892, MK425936; *Salvia sapinea* Epling, -, MF664652; *Salvia sarawschanica* Regel & Schmalh., -,

KU563868; *Salvia sarmentosa* Epling, -, MF664653; *Salvia scabiosifolia* Lam., -,  
 KU563811; *Salvia scabra* Thunb., KJ584297, KJ584233; *Salvia scabrida* Pohl, -,  
 MF622181; *Salvia scapiformis* Hance, KM886718, MG824267; *Salvia schimperii* Benth.,  
 KJ584298, KJ584174; *Salvia schizochila* E.Peter, -, KC473273; *Salvia schlechteri* Briq.,  
 KJ584299, KJ584235; *Salvia sclarea* L., MK425893, MK425937, \*\*\*; *Salvia sclareoides* Brot.,  
 -, KU563836; *Salvia scrophulariifolia* (Bunge) B.T. Drew, -, DQ667330; *Salvia*  
*scutellarioides* Kunth, MK425894, MK425938, \*\*\*; *Salvia semiatrata* Zucc., -,  
 DQ667295; *Salvia sericeotomentosa* Rech.f., -, KU563822; *Salvia sessei* Benth., -,  
 HQ418889; *Salvia sessilifolia* Baker, KJ584302, KJ584224; *Salvia setulosa* Fernald, -,  
 MF622182; *Salvia sharifii* Rech.f. & Esfand., -, KP294362; *Salvia sharpii* Epling & Mathias, -,  
 MF622183; *Salvia sikkimensis* E.Peter, MG824401, MG824270; *Salvia simulans* Kunth, -,  
 MF664654; *Salvia sinaloensis* Fernald, -, MF622184; *Salvia sinica* Migo, MG824402,  
 KJ397257; *Salvia smithii* E.Peter, MG824403, MG824272; *Salvia smyrnaea* Boiss., -,  
 KU563812; *Salvia somalensis* Vatke, KJ584304, KJ584240; *Salvia sonchifolia* C.Y. Wu,  
 MG824404, MG824273; *Salvia sonomensis* Greene, KP853005, KP852837; *Salvia*  
*sophrona* Briq., -, DQ667268; *Salvia sordida* Benth., -, MF664656; *Salvia spathacea* Greene,  
 KP853009, KP852841; *Salvia speciosa* C.Presl ex Benth., -, MF622185; *Salvia*  
*sphacelifolia* Epling, -, Jenks et al., 2013; *Salvia sphacelioides* Benth., -, MF664657; *Salvia*  
*splendens* Sellow ex Schult., MK425895, MK425939, \*\*\*; *Salvia sprucei* Briq., -,  
 MF664658; *Salvia squalens* Kunth, -, MF664659; *Salvia stachydifolia* Benth., -,  
 HQ418890; *Salvia stachyoides* Kunth, -, MF664661; *Salvia staminea* Montbret & Aucher ex  
 Benth., -, KU563863; *Salvia stenophylla* Burch. ex Benth., KJ584305, KJ584238; *Salvia*  
*stolonifera* Benth., -, MF622187; *Salvia striata* Benth., -, MF664662; *Salvia styphelus* Epling, -,  
 HQ418891; *Salvia subpalmatinervis* E.Peter, MG824406, JQ934160; *Salvia subrotunda* A.St.-  
 Hil. ex Benth., -, MF664663; *Salvia substolonifera* E.Peter, MG824407, EF373646; *Salvia*  
*sucrensis* J.R.I.Wood, -, MF664664; *Salvia suffruticosa* Montbret & Aucher ex Benth., -,  
 KU563813; *Salvia summa* A.Nelson, KJ584307, DQ667217; *Salvia sylvestris* Steud., -,  
 KJ584177; *Salvia syriaca* L., -, KP294364; *Salvia taraxacifolia* Coss. & Balansa, KJ584308,  
 DQ667209; *Salvia tchihatcheffii* (Fisch. & C.A.Mey.) Boiss., -, KU563814; *Salvia*  
*tehuacana* Fernald, -, MF664665; *Salvia tepicensis* Fernald, -, MF622188; *Salvia*  
*texana* (Scheele) Torr., -, KJ584199; *Salvia textitlana* B.L.Turner, -, MF664666; *Salvia*  
*thermarum* van Jaarsv., KJ584309, KJ584239; *Salvia thymoides* Benth., MK425896,  
 MK425940, \*\*\*; *Salvia thyrsiflora* Benth., -, MF664668; *Salvia tiliifolia* Vahl, -,  
 HQ418892; *Salvia tingitana* Etl., -, KJ584169; *Salvia tobeyi* Hedge, -, KU563865; *Salvia*  
*tolimensis* Kunth, -, MF622190; *Salvia tomentella* Pohl, -, MF622191; *Salvia tomentosa* Mill., -,  
 KU563816; *Salvia tonaticensis* ex S. Lara Cabrera, Bedolla & Zamudio, -, MF664670; *Salvia*  
*tortuosa* Kunth, -, HQ418893; *Salvia trichocalycina* Benth., -, DQ667283; *Salvia*  
*trichostephana* Epling, -, MF664671; *Salvia tricuspis* M.Martens & Galeotti, -,  
 DQ667293; *Salvia tricuspis* Franch., MG824410, EF373635; *Salvia trijuga* Diels, MG824412,  
 KU563779; *Salvia tubifera* Cav., -, HQ418894; *Salvia tubiflora* Sm., -, MF622192; *Salvia*  
*tuerckheimii* Urb., -, KU358697; *Salvia uliginosa* Benth., -, HQ418895; *Salvia umbratica* Hance,  
 MG824415, -, *Salvia univerticillata* Ramamoorthy ex Klitg., -, MF664673; *Salvia urica* Epling,  
 -, MF622193; *Salvia vaseyi* (Porter) Parish, KP853013, KP852842; *Salvia vazquezii* Iltis &  
 Ramamoorthy, -, MF622194; *Salvia veneris* Hedge, -, KJ584170; *Salvia venulosa* Epling, -,  
 HQ418896; *Salvia verbenaca* L., -, KJ584183; *Salvia verecunda* Epling, MK425897,  
 MF664674; *Salvia vermifolia* Hedge & Hub.-Mor., -, KU563866; *Salvia verticillata* L.,

MG824417, KU563826; *Salvia verticillata* subsp *amasiaca* (Freyn & Bornm.) Bornm., MK425898, MK425941, \*\*\*; *Salvia villosa* Fernald, -, Jenks et al., 2013; *Salvia virgata* Jacq., MK425899, MK425942, \*\*\*; *Salvia viridis* L., MK425900, MK425943, \*\*\*; *Salvia viscosa* Jacq., -, KU563838; *Salvia vitifolia* Benth., -, MF622195; *Salvia vvedenskii* Nikitina, -, KU563879; *Salvia wagneriana* Pol., MK425901, MK425944, \*\*\*; *Salvia wardii* E.Peter, MG824418, MG824287; *Salvia whitehousei* Alziar, KJ584311, DQ667320; *Salvia wiedemannii* Boiss., -, KU563817; *Salvia wuana* C.L. Xiang, MG824422, EU169476; *Salvia xalapensis* Benth., -, MF622197; *Salvia xanthocheila* Boiss. ex Benth., -, KU563842; *Salvia yangii* (Rusby) J.R.I.Wood, MK425902, MK425945, \*\*\*; *Salvia yosgadensis* Freyn & Bornm., -, KU563867; *Salvia yunnanensis* C.H.Wright, KT210224, EF373617.
