# Supplementary material for: Tracking temporal shifts in area, biomes, and pollinators in the radiation of Salvia (sages) across continents: leveraging anchored hybrid enrichment and targeted sequence data
Source: PubMed Central journal article supplement — Am J Bot. 2019 Apr 15;106(4):573–97. doi: 10.1002/ajb2.1268 (PMC6850103; doi:10.1002/ajb2.1268), 2019-04-15
Supplement: AJB2-106-573-s002.pdf [file AJB2-106-573-s002.pdf]

**Appendix S2.** Species names, subgeneric or clade designations, vouchers, GenBank accessions, biogeographical area scoring (see Appendix S4 for area names), biome scoring (see Appendix S5 for biome names), and pollinator scoring. The “*Salvia aegyptiaca* clade” is informally listed here with subg. *Zhumeria*. Species in the informal “*Heterosphace*” are listed here under two subgroups, New World “*Salviastrum*” or Old World “*Verticillata*.”

| species                   | author                                                     | accession_ets | accession_its | pollinator | clade        | area_S | area_N | area_M | area_W | area_R | area_A | area_C | biome_B | biome_C | biome_D | biome_G | biome_M |
|---------------------------|------------------------------------------------------------|---------------|---------------|------------|--------------|--------|--------|--------|--------|--------|--------|--------|---------|---------|---------|---------|---------|
| Lepechinia_calycina       | (Benth.) Epling                                            | KF307474      | JF301344      | bee        | sister       | 0      | 1      | 0      | 0      | 0      | 0      | 0      | 0       | 1       | 0       | 1       | 1       |
| Lepechinia_caulescens     | (Ortega) Epling                                            | KF307475      | KF307440      | bee        | sister       | 1      | 1      | 0      | 0      | 0      | 0      | 0      | 1       | 1       | 0       | 1       | 0       |
| Lepechinia_chamaedryoides | (Balls.) Epling                                            | MK425848      | MK425903      | bee        | sister       | 1      | 0      | 0      | 0      | 0      | 0      | 0      | 1       | 0       | 0       | 0       | 1       |
| Lepechinia_lamifolia      | (Benth.) Epling                                            | JF301320      | JF301348      | bee        | sister       | 1      | 0      | 0      | 0      | 0      | 0      | 0      | 1       | 0       | 0       | 0       | 1       |
| Lepechinia_leucophyllodes | (Ramamoorthy, Hiriart & Medrano) B.T. Drew, Cacho & Sytsma | MK425849      | MK425904      | bee        | sister       | 0      | 1      | 0      | 0      | 0      | 0      | 0      | 0       | 0       | 1       | 0       | 0       |
| Lepechinia_mexicana       | (S. Schauer) Epling                                        | JF301322      | JF301350      | bee        | sister       | 0      | 1      | 0      | 0      | 0      | 0      | 0      | 0       | 0       | 1       | 0       | 0       |
| Lepechinia_radula         | (Benth.) Epling                                            | KF307487      | KF307452      | bee        | sister       | 1      | 0      | 0      | 0      | 0      | 0      | 0      | 1       | 0       | 0       | 0       | 0       |
| Melissa_axillaris         | (Benth.) Bakh.f.                                           | JQ669189      | JQ669114      | bee        | sister       | 0      | 0      | 0      | 0      | 0      | 0      | 0      | 1       | 1       | 0       | 0       | 0       |
| Melissa_officinalis       | L.                                                         | MK425850      | MK425905      | bee        | sister       | 0      | 0      | 1      | 1      | 0      | 0      | 0      | 1       | 1       | 0       | 0       | 0       |
| Salvia_absconditiflora    | Greuter & Burdet                                           |               | KU563839      | bee        | scleara      | 0      | 0      | 0      | 1      | 0      | 0      | 0      | 0       | 0       | 0       | 0       | 1       |
| Salvia_acerifolia         | B.L. Turner                                                |               | MF664540      | bee        | calospatha   | 0      | 1      | 0      | 0      | 0      | 0      | 0      | 1       | 0       | 0       | 0       | 0       |
| Salvia_adenocaulata       | P.H. Davis                                                 |               | KU563828      | bee        | scleara      | 0      | 0      | 0      | 1      | 0      | 0      | 0      | 0       | 0       | 0       | 0       | 1       |
| Salvia_adenophora         | Fernald                                                    |               | MF622100      | bird       | calospatha   | 0      | 1      | 0      | 0      | 0      | 0      | 0      | 1       | 1       | 0       | 0       | 0       |
| Salvia_adenophylla        | Hedge & Hub.-Mor.                                          |               | KU563789      | bee        | salvia       | 0      | 0      | 0      | 1      | 0      | 0      | 0      | 0       | 0       | 0       | 0       | 1       |
| Salvia_aegyptiaca         | L.                                                         | KJ584254      | DQ667285      | bee        | zhumeria     | 0      | 0      | 1      | 1      | 1      | 0      | 0      | 0       | 0       | 1       | 0       | 1       |
| Salvia_aequidistans       | Fernald                                                    |               | MF622101      | bee        | calospatha   | 0      | 1      | 0      | 0      | 0      | 0      | 0      | 1       | 1       | 0       | 1       | 0       |
| Salvia_aerea              | H. Lévy                                                    | MG824294      | MG824166      | bee        | glutinaria   | 0      | 0      | 0      | 0      | 0      | 0      | 1      | 0       | 1       | 0       | 0       | 0       |
| Salvia_aethiops           | L.                                                         |               | KJ584163      | bee        | scleara      | 0      | 0      | 0      | 1      | 0      | 0      | 0      | 0       | 0       | 0       | 0       | 1       |
| Salvia_africana-caerulea  | L.                                                         | MK425851      | MK425906      | bird       | heterospatha | 0      | 0      | 0      | 0      | 0      | 1      | 0      | 0       | 0       | 0       | 0       | 0       |
| Salvia_africanalutata     | L.                                                         | KJ584256      |               | bee        | calospatha   | 0      | 0      | 0      | 0      | 0      | 0      | 0      | 1       | 1       | 0       | 0       | 1       |
| Salvia_agnes              | Kunth                                                      |               | MF622102      | bee        | calospatha   | 0      | 1      | 0      | 0      | 0      | 0      | 0      | 0       | 1       | 1       | 1       | 0       |
| Salvia_akiensis           | Benth.                                                     | LC060826      | LC060728      | bee        | glutinaria   | 0      | 0      | 0      | 0      | 0      | 0      | 1      | 1       | 0       | 0       | 0       | 0       |
| Salvia_amosana            | Rose                                                       |               | MF622103      | bee        | calospatha   | 0      | 1      | 0      | 0      | 0      | 0      | 0      | 1       | 1       | 0       | 0       | 0       |
| Salvia_alba               | J.R.I. Wood                                                |               | MF664543      | bee        | calospatha   | 1      | 0      | 0      | 0      | 0      | 0      | 0      | 1       | 0       | 0       | 0       | 0       |
| Salvia_albicaulis         | Benth.                                                     | KJ584257      | KJ584206      | bee        | heterospatha | 0      | 0      | 0      | 0      | 0      | 1      | 0      | 0       | 0       | 0       | 0       | 1       |
| Salvia_albimaculata       | Hedge & Hub.-Mor.                                          |               | KU563790      | bee        | salvia       | 0      | 0      | 0      | 1      | 0      | 0      | 0      | 0       | 0       | 0       | 0       | 1       |
| Salvia_albobocerulea      | Lindén                                                     |               | MF622104      | bee        | calospatha   | 0      | 1      | 0      | 0      | 0      | 0      | 0      | 0       | 1       | 0       | 0       | 0       |
| Salvia_alborosea          | Epling & Játiva                                            |               | MF622105      | bird       | calospatha   | 1      | 0      | 0      | 0      | 0      | 0      | 0      | 1       | 0       | 0       | 0       | 0       |
| Salvia_amarissima         | Cav.                                                       |               | MF622106      | bee        | calospatha   | 1      | 1      | 0      | 0      | 0      | 0      | 0      | 0       | 1       | 1       | 0       | 0       |
| Salvia_amethystina        | Sm.                                                        |               | MF664545      | bee&bird   | calospatha   | 1      | 0      | 0      | 0      | 0      | 0      | 0      | 1       | 0       | 0       | 0       | 0       |
| Salvia_amplexicaulis      | Lam.                                                       | MG824296      | KU563829      | bee        | scleara      | 0      | 0      | 1      | 0      | 0      | 0      | 0      | 0       | 0       | 0       | 1       | 1       |
| Salvia_ampifrons          | Briq.                                                      |               | MF622107      | bee        | calospatha   | 1      | 0      | 0      | 0      | 0      | 0      | 0      | 1       | 0       | 0       | 0       | 0       |
| Salvia_anatolica          | Hamzaoglu & A. Duran                                       |               | KU563840      | bee        | scleara      | 0      | 0      | 0      | 1      | 0      | 0      | 0      | 0       | 0       | 0       | 0       | 1       |
| Salvia_angulata           | Benth.                                                     |               | MF622108      | bee        | calospatha   | 1      | 0      | 0      | 0      | 0      | 0      | 0      | 1       | 0       | 0       | 0       | 0       |
| Salvia_angustiarum        | Epling                                                     | MK425852      | MF622109      | bee&bird   | calospatha   | 0      | 1      | 0      | 0      | 0      | 0      | 0      | 0       | 1       | 1       | 0       | 0       |
| Salvia_apiana             | KP852936                                                   |               | DQ667211      | bee        | audibertia   | 0      | 0      | 0      | 0      | 0      | 0      | 0      | 1       | 0       | 0       | 1       | 0       |
| Salvia_appendiculata      | E. Peter                                                   | MG824297      | MG824169      | bee        | glutinaria   | 0      | 0      | 0      | 0      | 0      | 0      | 0      | 1       | 1       | 0       | 0       | 0       |
| Salvia_aramiensis         | Rech.f.                                                    |               | KU563791      | bee        | salvia       | 0      | 0      | 0      | 1      | 0      | 0      | 0      | 0       | 1       | 1       | 0       | 0       |
| Salvia_arbuscula          | Fernald                                                    |               | HQ418846      | bird       | calospatha   | 0      | 1      | 0      | 0      | 0      | 0      | 0      | 1       | 1       | 0       | 0       | 0       |
| Salvia_areolata           | Epling                                                     |               | MF622110      | bee        | calospatha   | 1      | 0      | 0      | 0      | 0      | 0      | 0      | 1       | 0       | 0       | 0       | 0       |
| Salvia_areysiana          | Defflers                                                   | KJ584259      |               | bee        | zhumeria     | 0      | 0      | 0      | 0      | 1      | 0      | 0      | 0       | 0       | 0       | 0       | 0       |
| Salvia_argentea           | L.                                                         |               | KJ584164      | bee        | scleara      | 0      | 0      | 1      | 0      | 0      | 0      | 0      | 0       | 0       | 0       | 0       | 1       |
| Salvia_ariana             | Hedge                                                      |               | KU563843      | bee        | scleara      | 0      | 0      | 0      | 1      | 0      | 0      | 0      | 0       | 0       | 0       | 1       | 0       |
| Salvia_arisanensis        | Makino ex Hayata                                           | LC060827      | AB295100      | bee        | glutinaria   | 0      | 0      | 0      | 0      | 0      | 0      | 0      | 1       | 0       | 0       | 0       | 0       |
| Salvia_aristata           | Aucher ex Benth.                                           | JF301336      | DQ667280      | bee        | zhumeria     | 0      | 0      | 0      | 1      | 0      | 0      | 0      | 0       | 0       | 0       | 0       | 1       |
| Salvia_articulata         | Epling                                                     |               | MF622111      | bird       | calospatha   | 1      | 0      | 0      | 0      | 0      | 0      | 0      | 1       | 0       | 0       | 0       | 0       |
| Salvia_aspera             | M. Martens & Galeotti                                      |               | HQ418847      | bee&bird   | calospatha   | 0      | 1      | 0      | 0      | 0      | 0      | 0      | 1       | 0       | 1       | 0       | 0       |
| Salvia_atrocyanea         | Epling                                                     |               | MF622112      | bird       | calospatha   | 1      | 0      | 0      | 0      | 0      | 0      | 0      | 1       | 0       | 0       | 1       | 0       |
| Salvia_atropatana         | Bunge                                                      |               | KU563841      | bee        | scleara      | 0      | 0      | 0      | 1      | 0      | 0      | 0      | 1       | 0       | 0       | 0       | 1       |
| Salvia_atropurpurea       | C.Y. Wu                                                    | MG824298      | MG824170      | bee        | glutinaria   | 0      | 0      | 0      | 0      | 0      | 0      | 1      | 1       | 0       | 0       | 0       | 0       |
| Salvia_atrorubra          | C.Y. Wu                                                    | MG824299      | MG824171      | bee        | glutinaria   | 0      | 0      | 0      | 0      | 0      | 0      | 1      | 0       | 1       | 0       | 0       | 0       |
| Salvia_aucherii           | Benth.                                                     |               | KJ584193      | bee        | salvia       | 0      | 0      | 0      | 0      | 0      | 0      | 0      | 0       | 0       | 0       | 0       | 1       |
| Salvia_auritata           | L.F.                                                       | KJ584260      | KJ584218      | bee        | heterospatha | 0      | 0      | 0      | 0      | 0      | 1      | 0      | 0       | 0       | 0       | 0       | 1       |
| Salvia_austriaca          | Jacq.                                                      | MK425853      | MK425907      | bee        | scleara      | 0      | 0      | 1      | 0      | 0      | 0      | 0      | 1       | 0       | 0       | 0       | 0       |
| Salvia_axillaris          | Moc. & Sessé ex Benth.                                     | MK425854      | MK425908      | bee        | calospatha   | 0      | 1      | 0      | 0      | 0      | 0      | 0      | 0       | 1       | 1       | 0       | 0       |
| Salvia_azurea             | Michx. ex Vahl                                             | MK425855      | MK425909      | bee        | calospatha   | 0      | 1      | 0      | 0      | 0      | 0      | 0      | 0       | 0       | 0       | 0       | 1       |
| Salvia_baimaensis         | S.W. Su & Z.A. Shen                                        | MG824300      | JQ934103      | bee        | glutinaria   | 0      | 0      | 0      | 0      | 0      | 0      | 0      | 1       | 1       | 0       | 0       | 0       |
| Salvia_ballotaeflora      | Benth.                                                     |               | AY570396      | bee        | calospatha   | 0      | 1      | 0      | 0      | 0      | 0      | 0      | 0       | 1       | 1       | 0       | 0       |
| Salvia_balsiana           | (Rech.f.) Hedge                                            |               | KU563792      | bee        | salvia       | 0      | 0      | 0      | 1      | 0      | 0      | 0      | 1       | 0       | 0       | 0       | 0       |
| Salvia_bangii             | (Rusby) J.R.I. Wood                                        |               | DQ667263      | bee        | calospatha   | 1      | 0      | 0      | 0      | 0      | 0      | 0      | 1       | 0       | 0       | 0       | 1       |
| Salvia_bariensis          | Thulin                                                     | KJ584262      |               | bee        | zhumeria     | 0      | 0      | 0      | 0      | 1      | 0      | 0      | 0       | 0       | 0       | 1       | 0       |
| Salvia_betulifolia        | Epling                                                     | MK425856      | MF622113      | bird       | calospatha   | 0      | 1      | 0      | 0      | 0      | 0      | 0      | 1       | 1       | 1       | 0       | 0       |
| Salvia_bifidocalyx        | C.Y. Wu & Y.C. Huang                                       | MG824301      | MG824173      | bee        | glutinaria   | 0      | 0      | 0      | 0      | 0      | 0      | 1      | 0       | 1       | 0       | 0       | 0       |
| Salvia_blepharochlaena    | Hedge & Hub.-Mor.                                          |               | KU563793      | bee        | salvia       | 0      | 0      | 0      | 1      | 0      | 0      | 0      | 0       | 0       | 0       | 0       | 1       |
| Salvia_blepharophylla     | Brandege ex Epling                                         |               | HQ418850      | bird       | calospatha   | 0      | 1      | 0      | 0      | 0      | 0      | 0      | 1       | 1       | 1       | 0       | 0       |
| Salvia_bogotensis         | Benth.                                                     |               | MF664550      | bee        | calospatha   | 1      | 0      | 0      | 0      | 0      | 0      | 0      | 0       | 0       | 1       | 1       | 0       |
| Salvia_bowleyana          | (Bord.) Pobed.                                             | MG824302      | JQ934104      | bee        | glutinaria   | 0      | 0      | 0      | 0      | 0      | 0      | 1      | 1       | 0       | 0       | 0       | 0       |
| Salvia_brachyantha        | (Bord.) Pobed.                                             |               | KU563844      | bee        | scleara      | 0      | 0      | 0      | 0      | 0      | 0      | 0      | 0       | 0       | 0       | 0       | 1       |
| Salvia_brachyloma         | E. Peter                                                   |               | JQ934108      | bee        | glutinaria   | 0      | 0      | 0      | 0      | 0      | 0      | 0      | 1       | 1       | 0       | 0       | 0       |
| Salvia_brandegei          | Munz                                                       | KP852949      | KP852784      | bee        | audibertia   | 0      | 1      | 0      | 0      | 0      | 0      | 0      | 0       | 0       | 0       | 0       | 1       |
| Salvia_breviflora         | Moc. & Sessé ex Benth.                                     |               | MF664551      | bee        | calospatha   | 0      | 1      | 0      | 0      | 0      | 0      | 0      | 0       | 1       | 1       | 1       | 0       |
| Salvia_brevilabra         | Franch.                                                    |               | EF373638      | bee        | glutinaria   | 0      | 0      | 0      | 0      | 0      | 0      | 1      | 0       | 1       | 0       | 1       | 0       |
| Salvia_brevipes           | Benth.                                                     |               | MF622114      | bee        | calospatha   | 1      | 0      | 0      | 0      | 0      | 0      | 0      | 0       | 0       | 0       | 0       | 1       |
| Salvia_broussonetii       | Benth.                                                     | KJ584263      | KJ584225      | bee        | scleara      | 0      | 0      | 1      | 0      | 0      | 0      | 0      | 0       | 0       | 0       | 0       | 1       |
| Salvia_broussonetii       | Hedge                                                      |               | MF664553      | bird       | calospatha   | 0      | 1      | 0      | 0      | 0      | 0      | 0      | 1       | 1       | 0       | 0       | 0       |
| Salvia_buchariana         | Popov                                                      |               | KU563794      | bee        | salvia       | 0      | 0      | 0      | 1      | 0      | 0      | 0      | 0       | 0       | 0       | 1       | 0       |
| Salvia_bulleyana          | Diels                                                      | MG824307      | KU563780      | bee        | glutinaria   | 0      | 0      | 0      | 0      | 0      | 0      | 1      | 1       | 1       | 0       | 0       | 0       |
| Salvia_bullulata          | Benth.                                                     |               | MF664554      | bee&bird   | calospatha   | 1      | 0      | 0      | 0      | 0      | 0      | 0      | 0       | 0       | 0       | 0       | 1       |
| Salvia_bupleuroides       | Hook. & Arn.                                               |               | MF664555      | bee&bird   | calospatha   | 0      | 1      | 0      | 0      | 0      | 0      | 0      | 1       | 0       | 0       | 0       | 1       |
| Salvia_cabulica           | Benth.                                                     |               | KJ584189      | bee        | salvia       | 0      | 0      | 0      | 1      | 0      | 0      | 0      | 0       | 0       | 0       | 1       | 0       |
| Salvia_cacaliifolia       | Benth.                                                     | MG824308      | DQ667259      | bird       | calospatha   | 1      | 1      | 0      | 0      | 0      | 0      | 0      | 1       | 1       | 0       | 0       | 1       |
| Salvia_cadmica            |                                                            |               |               |            |              |        |        |        |        |        |        |        |         |         |         |         |         |

|                         |                                 |          |                    |             |               |   |   |   |   |   |   |   |   |   |   |   |
|-------------------------|---------------------------------|----------|--------------------|-------------|---------------|---|---|---|---|---|---|---|---|---|---|---|
| Salvia_curviflora       | Benth.                          | MF664567 | bird               | calosiphace | 0             | 1 | 0 | 0 | 0 | 0 | 0 | 1 | 1 | 0 | 0 | 0 |
| Salvia_cuspidata        | Ruiz & Pav.                     | MF664569 | bee                | calosiphace | 1             | 0 | 0 | 0 | 0 | 0 | 0 | 1 | 0 | 0 | 1 | 0 |
| Salvia_cyanescens       | Boiss. & Balansa                | KU563849 | bee                | scleara     | 0             | 0 | 0 | 1 | 0 | 0 | 0 | 0 | 0 | 0 | 1 | 0 |
| Salvia_cyanicalyx       | Epling                          | MF622125 | bee                | calosiphace | 1             | 0 | 0 | 0 | 0 | 0 | 0 | 0 | 1 | 0 | 0 | 1 |
| Salvia_cyclostegia      | E.Peter                         | MG824326 | EU169475           | bee         | glutinaria    | 0 | 0 | 0 | 0 | 0 | 0 | 0 | 1 | 0 | 0 | 0 |
| Salvia_cynica           | Dunn                            | MG824329 | KU563782           | bee         | glutinaria    | 0 | 0 | 0 | 0 | 0 | 0 | 1 | 1 | 0 | 0 | 0 |
| Salvia_dabieshanensis   | J.Q.He                          | MG824330 | MG824202           | bee         | glutinaria    | 0 | 0 | 0 | 0 | 0 | 0 | 1 | 1 | 0 | 0 | 0 |
| Salvia_daghestanica     | (Soss.) Menitsky                | KJ584187 | bee                | scleara     | 0             | 0 | 0 | 1 | 0 | 0 | 0 | 0 | 0 | 0 | 1 | 0 |
| Salvia_densiflora       | Benth.                          | MF664570 | bee                | calosiphace | 1             | 0 | 0 | 0 | 0 | 0 | 0 | 0 | 1 | 0 | 1 | 0 |
| Salvia_deserta          | Schangin                        | MG824331 | DQ132865           | bee         | scleara       | 0 | 0 | 0 | 1 | 0 | 0 | 0 | 0 | 0 | 1 | 0 |
| Salvia_deserti          | Decne.                          | KJ584270 | MF664570           | bee         | zhumeria      | 0 | 0 | 1 | 0 | 0 | 0 | 0 | 0 | 0 | 1 | 0 |
| Salvia_dianthera        | (Roth ex Roem. & Schult.) Briq. | JF301326 | DQ667329           | bee         | meriandra     | 0 | 0 | 0 | 1 | 1 | 0 | 0 | 0 | 1 | 0 | 1 |
| Salvia_dichroantha      | Stauf                           | KU563830 | KU563830           | bee         | scleara       | 0 | 0 | 0 | 1 | 0 | 0 | 0 | 0 | 0 | 1 | 0 |
| Salvia_diegoae          | Mart. Gord. & Lozada-Pérez      |          | MF664571           | bee&bird    | calosiphace   | 0 | 1 | 0 | 0 | 0 | 0 | 0 | 1 | 0 | 0 | 0 |
| Salvia_digituloides     | Diels                           | MG425866 | MK425917           | bee         | glutinaria    | 0 | 0 | 0 | 0 | 0 | 0 | 1 | 0 | 1 | 0 | 0 |
| Salvia_discolor         | Kunth                           |          | HQ418860           | bee         | calosiphace   | 1 | 1 | 0 | 0 | 0 | 0 | 0 | 1 | 0 | 1 | 0 |
| Salvia_disermas         | L.                              | KJ584271 | KJ584179           | bee         | scleara       | 0 | 0 | 0 | 0 | 1 | 0 | 0 | 0 | 0 | 1 | 0 |
| Salvia_disjuncta        | Fernald                         |          | MF622126           | bird        | calosiphace   | 1 | 1 | 0 | 0 | 0 | 0 | 0 | 1 | 1 | 0 | 0 |
| Salvia_divinorum        | Epling & Játiva                 |          | HQ418861           | bird        | calosiphace   | 0 | 1 | 0 | 0 | 0 | 0 | 0 | 1 | 1 | 0 | 0 |
| Salvia_dolomitica       | Codd                            | KJ584273 | KJ584213           | bee         | heterosiphace | 0 | 0 | 0 | 0 | 1 | 0 | 0 | 0 | 0 | 1 | 0 |
| Salvia_dombeyi          | Epling                          |          | HQ418862           | bird        | calosiphace   | 1 | 0 | 0 | 0 | 0 | 0 | 0 | 0 | 0 | 0 | 0 |
| Salvia_dominica         | L.                              |          | KJ864961           | bee         | scleara       | 0 | 0 | 0 | 1 | 0 | 0 | 0 | 0 | 0 | 1 | 0 |
| Salvia_dorisiana        | Standl.                         |          | HQ418863           | bird        | calosiphace   | 1 | 0 | 0 | 0 | 0 | 0 | 0 | 1 | 1 | 0 | 0 |
| Salvia_dorrii           | (Kellogg) Abrams                | KP852971 | DQ667229           | bee         | audibertia    | 0 | 1 | 0 | 0 | 0 | 0 | 0 | 0 | 0 | 1 | 0 |
| Salvia_dorystaechas     | B.T. Drew                       | MG425867 | MK425918           | bee         | dorystaechas  | 0 | 0 | 0 | 1 | 0 | 0 | 0 | 0 | 0 | 0 | 1 |
| Salvia_durifolia        | Epling                          |          | MF664574           | bee         | calosiphace   | 1 | 0 | 0 | 0 | 0 | 0 | 0 | 0 | 0 | 0 | 1 |
| Salvia_elegans          | Vahl                            | MG824334 | MG824206           | bird        | calosiphace   | 1 | 1 | 0 | 0 | 0 | 0 | 0 | 1 | 1 | 0 | 0 |
| Salvia_engelmannii      | A.Gray                          |          | KU563870           | bee         | heterosiphace | 0 | 1 | 0 | 0 | 0 | 0 | 0 | 0 | 0 | 1 | 0 |
| Salvia_eremostachya     | Jeps.                           | KP852977 | DQ667232           | bee&bird    | audibertia    | 0 | 1 | 0 | 0 | 0 | 0 | 0 | 0 | 0 | 1 | 0 |
| Salvia_eriphora         | Boiss. & Kotschy                |          | KU563850           | bee         | scleara       | 0 | 0 | 0 | 1 | 0 | 0 | 0 | 0 | 0 | 0 | 1 |
| Salvia_erythrostoma     | Epling                          |          | HQ418864           | bee&bird    | calosiphace   | 1 | 0 | 0 | 0 | 0 | 0 | 0 | 0 | 0 | 1 | 0 |
| Salvia_euphratica       | Montbret & Aucler ex Benth.     |          | KU563819           | bee         | salvia        | 0 | 0 | 0 | 1 | 0 | 0 | 0 | 1 | 0 | 0 | 1 |
| Salvia_evansiana        | Hand.-Mazz.                     | MG824335 | JQ934120           | bee         | glutinaria    | 0 | 0 | 0 | 0 | 0 | 0 | 1 | 0 | 1 | 0 | 0 |
| Salvia_exserta          | Griseb.                         |          | MF622128           | bird        | calosiphace   | 1 | 0 | 0 | 0 | 0 | 0 | 0 | 0 | 0 | 0 | 1 |
| Salvia_farinacea        | Benth.                          | MG824337 | JQ934121           | bee         | calosiphace   | 1 | 1 | 0 | 0 | 0 | 0 | 0 | 0 | 0 | 0 | 1 |
| Salvia_filifolia        | Ramamooorthy                    |          | MF664576           | bee         | calosiphace   | 0 | 1 | 0 | 0 | 0 | 0 | 0 | 1 | 1 | 0 | 0 |
| Salvia_filipes          | Benth.                          |          | MF664577           | bee         | calosiphace   | 0 | 1 | 0 | 0 | 0 | 0 | 0 | 0 | 0 | 0 | 0 |
| Salvia_fluccidifolia    | Fernald                         |          | HQ418865           | bee         | calosiphace   | 0 | 1 | 0 | 0 | 0 | 0 | 0 | 1 | 1 | 0 | 0 |
| Salvia_flava            | Forrest ex Diels                | MG824339 | EF373624           | bee         | glutinaria    | 0 | 0 | 0 | 0 | 0 | 0 | 1 | 1 | 1 | 0 | 0 |
| Salvia_flocculosa       | Benth.                          |          | MF664578           | bee         | calosiphace   | 1 | 0 | 0 | 0 | 0 | 0 | 0 | 0 | 1 | 0 | 1 |
| Salvia_florida          | Benth.                          |          | MF622130           | bird        | calosiphace   | 1 | 0 | 0 | 0 | 0 | 0 | 0 | 1 | 0 | 0 | 0 |
| Salvia_formosa          | L'Hér.                          |          | MF622131           | bird        | calosiphace   | 1 | 0 | 0 | 0 | 0 | 0 | 0 | 1 | 0 | 0 | 0 |
| Salvia_forreri          | Greene                          |          | MF622132           | bee         | calosiphace   | 0 | 1 | 0 | 0 | 0 | 0 | 0 | 1 | 1 | 0 | 0 |
| Salvia_frigida          | Boiss.                          |          | KU563851           | bee         | scleara       | 0 | 0 | 0 | 1 | 0 | 0 | 0 | 0 | 0 | 1 | 1 |
| Salvia_frutcosa         | Mill.                           |          | KJ584195           | bee         | salvia        | 0 | 0 | 0 | 1 | 0 | 0 | 0 | 0 | 0 | 0 | 1 |
| Salvia_fruticulosa      | Benth.                          |          | HQ418866           | bee         | calosiphace   | 0 | 1 | 0 | 0 | 0 | 0 | 0 | 0 | 1 | 1 | 0 |
| Salvia_fulgens          | Cav.                            | MG425868 | HQ418867           | bird        | calosiphace   | 1 | 1 | 0 | 0 | 0 | 0 | 0 | 1 | 1 | 0 | 0 |
| Salvia_funerea          | M.E.Jones                       | KP852980 | KU563881           | bee&bird    | audibertia    | 0 | 1 | 0 | 0 | 0 | 0 | 0 | 0 | 0 | 1 | 0 |
| Salvia_gachantiviana    | Fern. Alonso                    |          | MF664580           | bird        | calosiphace   | 1 | 0 | 0 | 0 | 0 | 0 | 0 | 0 | 0 | 1 | 0 |
| Salvia_galloana         | B.L.Turner                      |          | MF664581           | bee         | calosiphace   | 0 | 1 | 0 | 0 | 0 | 0 | 0 | 1 | 1 | 0 | 0 |
| Salvia_garipensis       | E. Meyer ex Benth.              |          | DQ667281           | bee         | salvia        | 0 | 0 | 0 | 0 | 0 | 1 | 0 | 0 | 0 | 1 | 0 |
| Salvia_geminata         | Thulin                          | KJ584276 |                    | zhumeria    | 0             | 0 | 0 | 0 | 1 | 0 | 0 | 0 | 1 | 0 | 0 | 0 |
| Salvia_gesneriflora     | Lindl. & Paxton                 |          | MF622133           | bird        | calosiphace   | 1 | 0 | 0 | 0 | 0 | 0 | 0 | 0 | 0 | 0 | 1 |
| Salvia_gilliesii        | (Benth.) J.R.I. Wood            |          | Jenks et al., 2013 | bee         | calosiphace   | 1 | 0 | 0 | 0 | 0 | 0 | 0 | 0 | 0 | 0 | 1 |
| Salvia_glabrescens      | Makino                          |          | AB295104           | bee         | glutinaria    | 0 | 0 | 0 | 0 | 0 | 0 | 1 | 1 | 0 | 0 | 0 |
| Salvia_glechomifolia    | Kunth                           |          | MF622134           | bee         | calosiphace   | 0 | 1 | 0 | 0 | 0 | 0 | 0 | 1 | 1 | 0 | 0 |
| Salvia_glutinosa        | L.                              | KF307496 | KJ584253           | bee         | glutinaria    | 0 | 0 | 1 | 1 | 0 | 0 | 0 | 1 | 1 | 0 | 0 |
| Salvia_gracilipes       | Epling                          |          | MF622135           | bee         | calosiphace   | 1 | 0 | 0 | 0 | 0 | 0 | 0 | 0 | 0 | 0 | 1 |
| Salvia_graciliramulosa  | Epling & Játiva                 |          | MF664582           | bird        | calosiphace   | 1 | 0 | 0 | 0 | 0 | 0 | 0 | 1 | 0 | 0 | 0 |
| Salvia_gravida          | Epling                          |          | HQ418868           | bird        | calosiphace   | 0 | 1 | 0 | 0 | 0 | 0 | 0 | 1 | 1 | 0 | 0 |
| Salvia_groatae          | Brandegee                       | JF301331 | HQ418869           | bee&bird    | audibertia    | 0 | 1 | 0 | 0 | 0 | 0 | 0 | 0 | 0 | 1 | 0 |
| Salvia_greggii          | A.Gray                          |          | HQ418870           | bird        | calosiphace   | 0 | 1 | 0 | 0 | 0 | 0 | 0 | 0 | 1 | 1 | 0 |
| Salvia_grewifolia       | S.Moore                         |          | HQ418871           | bird        | calosiphace   | 1 | 0 | 0 | 0 | 0 | 0 | 0 | 0 | 0 | 0 | 1 |
| Salvia_guadalajarensis  | Briq.                           |          | MF664584           | bee         | calosiphace   | 0 | 1 | 0 | 0 | 0 | 0 | 0 | 1 | 1 | 0 | 0 |
| Salvia_guarantica       | Benth.                          |          | KC473237           | bird        | calosiphace   | 1 | 1 | 0 | 0 | 0 | 0 | 0 | 1 | 0 | 0 | 0 |
| Salvia_haenkei          | Benth.                          |          | DQ667271           | bird        | calosiphace   | 1 | 0 | 0 | 0 | 0 | 0 | 0 | 1 | 0 | 0 | 0 |
| Salvia_handelii         | E.Peter                         | MG824340 | MG824211           | bee         | glutinaria    | 0 | 0 | 0 | 0 | 0 | 0 | 1 | 0 | 0 | 0 | 1 |
| Salvia_heckeri          | Regel                           |          | MF664587           | bird        | calosiphace   | 1 | 0 | 0 | 0 | 0 | 0 | 0 | 1 | 0 | 0 | 0 |
| Salvia_heldreichiana    | Benth.                          |          | KU563799           | bee         | calosiphace   | 0 | 1 | 0 | 0 | 0 | 0 | 0 | 0 | 0 | 0 | 0 |
| Salvia_helianthemifolia | Benth.                          | MG425869 | MF664588           | bee         | calosiphace   | 0 | 1 | 0 | 0 | 0 | 0 | 0 | 1 | 1 | 0 | 0 |
| Salvia_henryi           | A.Gray                          | JF301337 | DQ667216           | bird        | heterosiphace | 0 | 1 | 0 | 0 | 0 | 0 | 0 | 1 | 1 | 0 | 0 |
| Salvia_herbaea          | Benth.                          |          | MF622136           | bee         | calosiphace   | 1 | 1 | 0 | 0 | 0 | 0 | 0 | 1 | 1 | 0 | 0 |
| Salvia_herbanica        | A.Santos & M. Fernández         | KJ584278 | KJ584246           | bee         | zhumeria      | 0 | 0 | 1 | 0 | 0 | 0 | 0 | 0 | 0 | 0 | 1 |
| Salvia_heterochroa      | E.Peter                         | MG824341 | KJ584252           | bee         | glutinaria    | 0 | 0 | 0 | 0 | 0 | 0 | 0 | 1 | 0 | 1 | 0 |
| Salvia_heterofolia      | Epling & Mathias                |          | MF664590           | bee         | calosiphace   | 0 | 1 | 0 | 0 | 0 | 0 | 0 | 1 | 1 | 0 | 0 |
| Salvia_hians            | Royle ex Benth.                 | MG425870 | MK425919           | bee         | glutinaria    | 0 | 0 | 0 | 1 | 0 | 0 | 0 | 1 | 1 | 0 | 1 |
| Salvia_hidalgensis      | Miranda                         |          | MF664591           | bird        | calosiphace   | 0 | 1 | 0 | 0 | 0 | 0 | 0 | 0 | 0 | 1 | 0 |
| Salvia_hierosolymitana  | Boiss.                          | MG824342 |                    | bee         | scleara       | 0 | 0 | 1 | 0 | 0 | 0 | 0 | 0 | 0 | 0 | 1 |
| Salvia_hilarii          | Benth.                          |          | MF622137           | bird        | calosiphace   | 1 | 0 | 0 | 0 | 0 | 0 | 0 | 0 | 0 | 0 | 0 |
| Salvia_hintonii         | Epling                          |          | MF664592           | bee         | calosiphace   | 0 | 1 | 0 | 0 | 0 | 0 | 0 | 1 | 0 | 0 | 0 |
| Salvia_hirtella         | Vahl                            |          | DQ667326           | bird        | calosiphace   | 1 | 0 | 0 | 0 | 0 | 0 | 0 | 1 | 0 | 0 | 1 |
| Salvia_hispanica        | L.                              |          | MF664593           | bee         | calosiphace   | 1 | 1 | 0 | 0 | 0 | 0 | 0 | 1 | 1 | 0 | 0 |
| Salvia_holwayi          | Epling                          | MG425871 | MK425920           | bird        | calosiphace   | 1 | 0 | 0 | 0 | 0 | 0 | 0 | 1 | 1 | 0 | 0 |
| Salvia_holwayi_2        | S.F.Blake                       |          | MF622138           | bird        | calosiphace   | 1 | 0 | 0 | 0 | 0 | 0 | 0 | 1 | 1 | 0 | 0 |
| Salvia_honania          | L.H.Bailey                      | MG824343 | MG824213           | bee         | glutinaria    | 0 | 0 | 0 | 0 | 0 | 0 | 0 | 1 | 0 | 0 | 0 |
| Salvia_huberi           | Hedge                           |          | KU563800           | bee         | salvia        | 0 | 0 | 0 | 1 | 0 | 0 | 0 | 1 | 0 | 0 | 1 |
| Salvia_huphensis        | E.Peter                         | MG824345 | MG824215           | bee         | glutinaria    | 0 | 0 | 0 | 0 | 0 | 0 | 1 | 1 | 0 | 0 | 0 |
| Salvia_hydrangea        | DC. ex Benth.                   |          | KP294355           | bee         | salvia        | 0 | 0 | 0 | 1 | 0 | 0 | 0 | 0 | 0 | 0 | 1 |
| Salvia_hyocharis        | Diels                           | MG824346 | MG824216           | bee         | glutinaria    | 0 | 0 | 0 | 0 | 0 | 0 | 1 | 1 | 1 | 0 | 0 |
| Salvia_hypargeia        | Fisch. & C.A.Mey.               |          | KU563877           | bee         | scleara       | 0 | 0 | 0 | 1 | 0 | 0 | 0 | 0 | 0 | 1 | 0 |
| Salvia_hypoleuca        | Benth.                          |          | KU563852           | bee         | scleara       | 0 | 0 | 0 | 1 | 0 | 0 | 0 | 1 | 1 | 0 | 0 |
| Salvia_ibugana          | J.G. González                   |          | MK425921           | bee         | calosiphace   | 0 | 1 | 0 | 0 | 0 | 0 | 0 | 1 | 1 | 0 | 0 |
| Salvia_inconspicua      | Benth.                          |          | DQ667298           | bee         | calosiphace   | 0 | 1 | 0 | 0 | 0 | 0 | 0 | 1 | 1 | 0 | 0 |
| Salvia_indica           | L.                              |          | KU563853           | bee         | scleara       | 0 | 0 | 0 | 1 | 0 | 0 | 0 | 0 | 0 | 0 | 1 |
| Salvia_infusata         | Epling                          |          | MF622139           | bee         | calosiphace   | 1 | 1 | 0 | 0 | 0 | 0 | 0 | 1 | 1 | 0 | 0 |
| Salvia_interrupta       | Schoub.                         |          | KJ584191           | bee         | salvia        | 0 | 0 | 1 | 0 | 0 | 0 | 0 | 0 | 1 | 0 | 0 |
| Salvia_involuta         | Cav.                            |          | MF622140           | bee         | calosiphace   | 1 | 1 | 0 | 0 | 0 | 0 | 0 | 1 | 1 | 0 | 0 |
| Salvia_iodantha         | Fernald                         |          | MF622141           | bird        | calosiphace   | 1 | 1 | 0 | 0 | 0 | 0 | 0 | 1 | 1 | 0 | 0 |
| Salvia_ionocalyx        | Epling                          |          | MF622142           | bee&bird    | calosiphace   | 1 | 0 | 0 | 0 | 0 | 0 | 0 | 0 | 1 | 0 | 0 |
| Salvia_ionensis         | Nakai ex H.Hara                 | LC060831 | LC060730           | bee         | glutinaria    | 0 | 0 | 0 | 0 | 0 | 0 | 1 | 1 | 0 | 0 | 0 |
| Salvia_jaiminintoniana  | Ramamooorthy ex B.L.Turner      |          | MF622143           | bee         |               |   |   |   |   |   |   |   |   |   |   |   |

|                                        |                               |                    |          |          |             |   |   |   |   |   |   |     |   |   |   |   |   |
|----------------------------------------|-------------------------------|--------------------|----------|----------|-------------|---|---|---|---|---|---|-----|---|---|---|---|---|
| <i>Salvia_leucodermis</i>              | Baker                         | KJ584283           | KJ584220 | bird     | heterospace | 0 | 0 | 0 | 0 | 0 | 1 | 0   | 1 | 0 | 0 | 1 | 0 |
| <i>Salvia_leucophylla</i>              | Greene                        | KP852815           |          | bee      | audibertia  | 0 | 1 | 0 | 0 | 0 | 0 | 0   | 0 | 0 | 0 | 0 | 1 |
| <i>Salvia_liguliflora</i>              | Y.Z. Sun                      | MG824353           | JQ934128 | bee      | glutinaria  | 0 | 0 | 0 | 0 | 0 | 0 | 1   | 1 | 0 | 0 | 0 | 0 |
| <i>Salvia_limbata</i>                  | C.A.Mey.                      | KU563854           |          | bee      | scleara     | 0 | 0 | 0 | 1 | 0 | 0 | 0   | 1 | 0 | 0 | 1 | 0 |
| <i>Salvia_lineata</i>                  | Benth.                        | MF622148           |          | bird     | calospace   | 0 | 1 | 0 | 0 | 0 | 0 | 0   | 0 | 1 | 1 | 0 | 0 |
| <i>Salvia_littae</i>                   | Vis.                          | MF622150           |          | bird     | calospace   | 0 | 1 | 0 | 0 | 0 | 0 | 0   | 0 | 1 | 1 | 0 | 0 |
| <i>Salvia_lobbia</i>                   | Epling                        | MF622151           |          | bird     | calospace   | 1 | 0 | 0 | 0 | 0 | 0 | 0   | 1 | 0 | 0 | 0 | 0 |
| <i>Salvia_longispicata</i>             | M.Martens & Galeotti          | HQ418876           |          | bee      | calospace   | 1 | 1 | 0 | 0 | 0 | 0 | 0   | 1 | 1 | 0 | 0 | 0 |
| <i>Salvia_longistyla</i>               | Benth.                        | MF622152           |          | bird     | calospace   | 0 | 1 | 0 | 0 | 0 | 0 | 0   | 1 | 1 | 0 | 0 | 0 |
| <i>Salvia_lophanthoides</i>            | Fernald                       | MF664607           |          | bee      | calospace   | 0 | 1 | 0 | 0 | 0 | 0 | 0   | 1 | 0 | 0 | 0 | 0 |
| <i>Salvia_lutescens</i>                | (Koidz.) Koidz.               | LC060837           | AB262443 | bee      | glutinaria  | 0 | 0 | 0 | 0 | 0 | 0 | 1   | 1 | 0 | 0 | 0 | 0 |
| <i>Salvia_lycioides</i>                | A.Gray                        | MF622153           |          | bee      | calospace   | 0 | 1 | 0 | 0 | 0 | 0 | 0   | 0 | 1 | 1 | 0 | 0 |
| <i>Salvia_lyrata</i>                   | L.                            | MK425874           | MK425923 | bee      | heterospace | 0 | 1 | 0 | 0 | 0 | 0 | 0   | 0 | 1 | 1 | 0 | 0 |
| <i>Salvia_macrophylla</i>              | Benth.                        | HQ418877           |          | bird     | calospace   | 1 | 0 | 0 | 0 | 0 | 0 | 0   | 1 | 0 | 0 | 0 | 0 |
| <i>Salvia_madrensis</i>                | Seem.                         | HQ418878           |          | bird     | calospace   | 1 | 1 | 0 | 0 | 0 | 0 | 0   | 1 | 1 | 0 | 0 | 0 |
| <i>Salvia_mairei</i>                   | H. Lévl.                      | MG824356           | MG824226 | bee      | glutinaria  | 0 | 0 | 0 | 0 | 0 | 0 | 1   | 1 | 0 | 0 | 0 | 0 |
| <i>Salvia_majdae</i>                   | Ramamoorthy                   | MK425875           | MK425924 | bee      | zumeria     | 0 | 0 | 0 | 1 | 0 | 0 | 0   | 1 | 0 | 0 | 0 | 0 |
| <i>Salvia_manantianensis</i>           | Ramamoorthy                   | MK425876           | MK425925 | bee      | calospace   | 0 | 1 | 0 | 0 | 0 | 0 | 0   | 1 | 1 | 0 | 0 | 0 |
| <i>Salvia_marashica</i>                | Ilçim, Celep & Dogan          | KU563802           |          | bee      | salvia      | 0 | 0 | 0 | 1 | 0 | 0 | 0   | 0 | 0 | 0 | 0 | 1 |
| <i>Salvia_margaritae</i>               | Botsch.                       | KU563880           |          | bee      | zumeria     | 0 | 0 | 0 | 1 | 0 | 0 | 0   | 0 | 0 | 0 | 1 | 0 |
| <i>Salvia_maximowicziana</i>           | Hemsl.                        | KM886717           | KM886750 | bee      | glutinaria  | 0 | 0 | 0 | 0 | 0 | 0 | 1   | 1 | 1 | 0 | 0 | 0 |
| <i>Salvia_maymanica</i>                | Hedge                         | KU563805           |          | bee      | salvia      | 0 | 0 | 0 | 1 | 0 | 0 | 0   | 0 | 0 | 1 | 0 | 0 |
| <i>Salvia_meliensis</i>                | S.W.Su                        | MG824359           | JQ934131 | bee      | glutinaria  | 0 | 0 | 0 | 0 | 0 | 0 | 1   | 1 | 0 | 0 | 0 | 0 |
| <i>Salvia_melaleuca</i>                | Epling                        | MF664608           |          | bird     | calospace   | 1 | 0 | 0 | 0 | 0 | 0 | 0   | 0 | 0 | 0 | 1 | 0 |
| <i>Salvia_melissiflora</i>             | Benth.                        | MF664609           |          | bird     | calospace   | 1 | 0 | 0 | 0 | 0 | 0 | 0   | 1 | 0 | 0 | 1 | 0 |
| <i>Salvia_melissodora</i>              | Lag.                          | MF622154           |          | bee      | calospace   | 0 | 1 | 0 | 0 | 0 | 0 | 0   | 1 | 1 | 1 | 0 | 0 |
| <i>Salvia_mellifera</i>                | Greene                        | KP852995           | DQ667220 | bee      | audibertia  | 0 | 1 | 0 | 0 | 0 | 0 | 0   | 0 | 0 | 0 | 1 | 0 |
| <i>Salvia_merjamie</i>                 | Forssk.                       | KJ584286           | KJ584184 | bee      | scleara     | 0 | 0 | 0 | 0 | 1 | 0 | 0   | 0 | 0 | 0 | 1 | 0 |
| <i>Salvia_moxiae</i>                   | Epling                        | MK425877           |          | bee      | calospace   | 0 | 1 | 0 | 0 | 0 | 0 | 0   | 0 | 1 | 0 | 0 | 0 |
| <i>Salvia_mexicana</i>                 | L.                            | MF622155           |          | bee&bird | calospace   | 1 | 1 | 0 | 0 | 0 | 0 | 0   | 0 | 1 | 0 | 0 | 0 |
| <i>Salvia_microphylla</i>              | Kunth                         | MF622158           |          | bird     | calospace   | 1 | 1 | 0 | 0 | 0 | 0 | 0   | 1 | 1 | 1 | 1 | 0 |
| <i>Salvia_microphylla_var_neurepia</i> | (Fernald) Epling              | Jenks et al., 2013 |          | bird     | calospace   | 0 | 1 | 0 | 0 | 0 | 0 | 0   | 0 | 1 | 0 | 0 | 0 |
| <i>Salvia_microstegia</i>              | Boiss. & Balansa              | KJ584171           |          | bee      | scleara     | 0 | 0 | 0 | 1 | 0 | 0 | 0   | 0 | 0 | 0 | 0 | 1 |
| <i>Salvia_miltiorrhiza</i>             | Bunge                         | MK425878           | MK425926 | bee      | glutinaria  | 0 | 0 | 0 | 0 | 0 | 1 | 1   | 0 | 0 | 0 | 0 | 0 |
| <i>Salvia_minarum</i>                  | Briq.                         | MF664613           |          | bee      | calospace   | 1 | 0 | 0 | 0 | 0 | 0 | 0   | 1 | 0 | 0 | 0 | 0 |
| <i>Salvia_minata</i>                   | Fernald                       | Jenks et al., 2013 |          | bird     | calospace   | 1 | 0 | 0 | 0 | 0 | 0 | 0   | 1 | 0 | 0 | 0 | 0 |
| <i>Salvia_misella</i>                  | Kunth                         | MF664614           |          | bee      | calospace   | 0 | 1 | 0 | 0 | 0 | 0 | 0   | 0 | 1 | 0 | 0 | 0 |
| <i>Salvia_mocinoi</i>                  | Benth.                        | DQ667274           |          | bee      | calospace   | 1 | 1 | 0 | 0 | 0 | 0 | 0   | 1 | 1 | 0 | 0 | 0 |
| <i>Salvia_modesta</i>                  | Boiss.                        | KU563856           |          | bee      | scleara     | 0 | 0 | 0 | 1 | 0 | 0 | 0   | 0 | 0 | 0 | 1 | 0 |
| <i>Salvia_mohavensis</i>               | Greene                        | KP852997           | KP852829 | bee&bird | audibertia  | 0 | 1 | 0 | 0 | 0 | 0 | 0   | 0 | 0 | 1 | 0 | 0 |
| <i>Salvia_moniliformis</i>             | Fernald                       | MF622160           |          | bee      | calospace   | 0 | 1 | 0 | 0 | 0 | 0 | 0   | 0 | 1 | 1 | 0 | 0 |
| <i>Salvia_montbretii</i>               | Benth.                        | KU563869           |          | bee      | scleara     | 0 | 0 | 0 | 1 | 0 | 0 | 0   | 0 | 0 | 0 | 1 | 0 |
| <i>Salvia_moorcroftiana</i>            | Wall. ex Benth.               | KU563857           |          | bee      | scleara     | 0 | 0 | 0 | 1 | 0 | 0 | 0   | 0 | 1 | 1 | 0 | 0 |
| <i>Salvia_muelleri</i>                 | Epling                        | MF622161           |          | bee&bird | calospace   | 0 | 1 | 0 | 0 | 0 | 0 | 0   | 0 | 1 | 0 | 0 | 0 |
| <i>Salvia_muri</i>                     | L.Bolus                       | KJ584288           | KJ584208 | bee      | heterospace | 0 | 1 | 0 | 0 | 0 | 0 | 0   | 0 | 1 | 0 | 0 | 0 |
| <i>Salvia_multicaulis</i>              | Vahl                          | KP294353           |          | bee      | salvia      | 0 | 0 | 0 | 1 | 0 | 0 | 0   | 0 | 0 | 0 | 1 | 0 |
| <i>Salvia_munzii</i>                   | Epling                        | DQ667224           |          | bee      | audibertia  | 0 | 1 | 0 | 0 | 0 | 0 | 0   | 0 | 0 | 0 | 0 | 1 |
| <i>Salvia_muscarioides</i>             | Fernald                       | MF664616           |          | bee      | calospace   | 0 | 1 | 0 | 0 | 0 | 0 | 0   | 1 | 1 | 0 | 0 | 0 |
| <i>Salvia_myriantha</i>                | Kunth                         | MF664617           |          | bee&bird | calospace   | 1 | 0 | 0 | 0 | 0 | 0 | 0   | 1 | 1 | 0 | 0 | 0 |
| <i>Salvia_namaensis</i>                | Schinz                        | KJ584289           | KJ584217 | bee      | heterospace | 0 | 0 | 0 | 0 | 0 | 1 | 0   | 0 | 0 | 1 | 0 | 0 |
| <i>Salvia_nana</i>                     | Kunth                         | MF664618           |          | bee      | calospace   | 0 | 1 | 0 | 0 | 0 | 0 | 0   | 1 | 1 | 0 | 1 | 0 |
| <i>Salvia_nanchuanensis</i>            | H.T. Sun                      | MG824364           |          | bee&bird | glutinaria  | 0 | 0 | 0 | 0 | 0 | 1 | 1   | 0 | 0 | 0 | 0 | 0 |
| <i>Salvia_napifolia</i>                | Jacq.                         | KU563827           |          | bee      | heterospace | 0 | 0 | 0 | 0 | 0 | 0 | 0   | 1 | 0 | 0 | 0 | 0 |
| <i>Salvia_nepetoides</i>               | Kunth                         | MK425879           |          | bee      | calospace   | 0 | 1 | 0 | 0 | 0 | 0 | 0   | 1 | 1 | 0 | 0 | 0 |
| <i>Salvia_nervata</i>                  | M.Martens & Galeotti          | MF622162           |          | bird     | calospace   | 1 | 1 | 0 | 0 | 0 | 0 | 0   | 1 | 1 | 0 | 0 | 0 |
| <i>Salvia_nervosa</i>                  | Benth.                        | MF664619           |          | bee      | calospace   | 1 | 0 | 0 | 0 | 0 | 0 | 0   | 0 | 0 | 0 | 1 | 0 |
| <i>Salvia_nilotica</i>                 | Juss. ex Jacq.                | KJ584229           |          | bee      | heterospace | 0 | 0 | 0 | 0 | 1 | 1 | 0   | 1 | 0 | 0 | 1 | 0 |
| <i>Salvia_nipponica</i>                | Miq.                          | LC060848           | AB295103 | bee      | glutinaria  | 0 | 0 | 0 | 0 | 0 | 0 | 1   | 1 | 0 | 0 | 0 | 0 |
| <i>Salvia_nitida</i>                   | (M.Martens & Galeotti) Benth. | MF664620           |          | bee      | calospace   | 0 | 1 | 0 | 0 | 0 | 0 | 0   | 1 | 1 | 0 | 0 | 0 |
| <i>Salvia_nubicola</i>                 | Wall. ex Sweet                | MG824367           | KU563786 | bee      | glutinaria  | 0 | 0 | 0 | 1 | 0 | 0 | 0   | 0 | 0 | 0 | 1 | 0 |
| <i>Salvia_nutans</i>                   | L.                            | KU563833           |          | bee      | scleara     | 0 | 0 | 1 | 0 | 0 | 0 | 0   | 0 | 0 | 0 | 1 | 0 |
| <i>Salvia_nydeggeri</i>                | Hub.-Mor.                     | KU563803           |          | bee      | salvia      | 0 | 0 | 0 | 1 | 0 | 0 | 0   | 0 | 0 | 0 | 0 | 1 |
| <i>Salvia_oaxacana</i>                 | Fernald                       | MK425880           | MK425927 | bird     | calospace   | 0 | 1 | 0 | 0 | 0 | 0 | 0   | 0 | 1 | 0 | 0 | 0 |
| <i>Salvia_occidentalis</i>             | Sw.                           | HQ418882           |          | bee      | calospace   | 1 | 1 | 0 | 0 | 0 | 0 | 0   | 1 | 0 | 0 | 0 | 0 |
| <i>Salvia_officinalis</i>              | L.                            | MK425881           | MK425928 | bee      | salvia      | 0 | 0 | 0 | 1 | 0 | 0 | 0   | 1 | 0 | 0 | 0 | 1 |
| <i>Salvia_omeiana</i>                  | E.Peter                       | MG824369           | EF373642 | bee      | glutinaria  | 0 | 0 | 0 | 0 | 0 | 0 | 1   | 1 | 1 | 0 | 0 | 0 |
| <i>Salvia_omeroxycalyx</i>             | Hayata                        | AB353205           |          | bee      | glutinaria  | 0 | 0 | 0 | 0 | 0 | 0 | 1   | 1 | 0 | 0 | 0 | 0 |
| <i>Salvia_oppoistiflora</i>            | Rutz. & Pav.                  | HQ418883           |          | bird     | calospace   | 1 | 0 | 0 | 0 | 0 | 0 | 1   | 0 | 0 | 0 | 1 | 0 |
| <i>Salvia_ortigera</i>                 | Benth.                        | DQ667273           |          | bird     | calospace   | 1 | 0 | 0 | 0 | 0 | 0 | 0   | 1 | 0 | 0 | 0 | 0 |
| <i>Salvia_ovalifolia</i>               | A.S.T.-Hill. ex Benth.        | DQ667315           |          | bee      | calospace   | 1 | 0 | 0 | 0 | 0 | 0 | 0   | 1 | 0 | 0 | 1 | 0 |
| <i>Salvia_oxophora</i>                 | Briq.                         | HQ418884           |          | bird     | calospace   | 1 | 0 | 0 | 0 | 0 | 0 | 0   | 1 | 0 | 0 | 0 | 0 |
| <i>Salvia_pachyphylla</i>              | Epling ex Munz                | KP853003           | DQ667230 | bee&bird | audibertia  | 0 | 1 | 0 | 0 | 0 | 0 | 0   | 1 | 1 | 0 | 0 | 0 |
| <i>Salvia_pachystachya</i>             | Trautv.                       | KU563804           |          | bee      | salvia      | 0 | 0 | 0 | 1 | 0 | 0 | 0   | 1 | 0 | 0 | 1 | 0 |
| <i>Salvia_palaestina</i>               | Benth.                        | KJ584175           |          | bee      | scleara     | 0 | 0 | 0 | 1 | 0 | 0 | 0   | 0 | 0 | 1 | 0 | 1 |
| <i>Salvia_palaensis</i>                | Epling                        | MF664622           |          | bird     | calospace   | 0 | 1 | 0 | 0 | 0 | 0 | 0   | 1 | 0 | 0 | 0 | 0 |
| <i>Salvia_pallida</i>                  | Benth.                        | MF664623           |          | bee      | calospace   | 1 | 0 | 0 | 0 | 0 | 0 | 0   | 0 | 0 | 0 | 1 | 0 |
| <i>Salvia_palmieri</i>                 | A.Gray                        | MF664624           |          | bee      | calospace   | 0 | 1 | 0 | 0 | 0 | 0 | 0   | 0 | 1 | 0 | 0 | 0 |
| <i>Salvia_pansamalensis</i>            | Donn.Sm.                      | MF622163           |          | bird     | calospace   | 1 | 0 | 0 | 0 | 0 | 0 | 0   | 1 | 1 | 0 | 0 | 0 |
| <i>Salvia_paohsingensis</i>            | C.Y.Wu                        | MG824370           | MG824239 | bee      | glutinaria  | 0 | 0 | 0 | 0 | 0 | 0 | 1   | 1 | 0 | 0 | 0 | 0 |
| <i>Salvia_paramiltiorrhiza</i>         | H.W.Li & X.L.Huang            | JQ934140           |          | bee      | glutinaria  | 0 | 0 | 0 | 0 | 0 | 0 | 1   | 1 | 0 | 0 | 0 | 0 |
| <i>Salvia_parryi</i>                   | A.Gray                        | MF622164           |          | bee      | calospace   | 0 | 1 | 0 | 0 | 0 | 0 | 0   | 0 | 1 | 1 | 0 | 0 |
| <i>Salvia_patens</i>                   | Cav.                          | MK425882           | MK425929 | bird     | calospace   | 0 | 1 | 0 | 0 | 0 | 0 | 0   | 1 | 1 | 0 | 0 | 0 |
| <i>Salvia_pauciserrata</i>             | Benth.                        | MF664625           |          | bird     | calospace   | 1 | 0 | 0 | 0 | 0 | 0 | 0   | 1 | 0 | 0 | 0 | 0 |
| <i>Salvia_pennisularis</i>             | Brandege                      | MF622165           |          | bird     | calospace   | 0 | 1 | 0 | 0 | 0 | 0 | 0   | 0 | 0 | 0 | 1 | 0 |
| <i>Salvia_penninoli</i>                | Epling                        | MF664626           |          | bee      | calospace   | 0 | 1 | 0 | 0 | 0 | 0 | 0   | 0 | 0 | 1 | 0 | 0 |
| <i>Salvia_pentstemonoides</i>          | Kunth & C.D. Bouché           | KU563871           |          | bird     | heterospace | 0 | 1 | 0 | 0 | 0 | 0 | 0   | 0 | 0 | 0 | 1 | 0 |
| <i>Salvia_perlonga</i>                 | Fernald                       | MF664627           |          | bee&bird | calospace   | 0 | 1 | 0 | 0 | 0 | 0 | 0   | 1 | 1 | 0 | 0 | 0 |
| <i>Salvia_persopolitana</i>            | Boiss.                        | KU563858           |          | bee      | scleara     | 0 | 0 | 0 | 1 | 0 | 0 | 0   | 1 | 0 | 1 | 0 | 0 |
| <i>Salvia_personata</i>                | Epling                        | DQ667269           |          | bee      | calospace   | 1 | 0 | 0 | 0 | 0 | 0 | 0   | 1 | 0 | 0 | 1 | 0 |
| <i>Salvia_petrophila</i>               | Rydb.                         | MG824372           | MG824241 | bee      | glutinaria  | 0 | 0 | 0 | 0 | 0 | 0 | 1   | 1 | 0 | 0 | 0 | 0 |
| <i>Salvia_phlomisoides</i>             | Asso                          | KJ584186           |          | bee      | scleara     | 0 | 0 | 1 | 0 | 0 | 0 | 0   | 0 | 0 | 0 | 0 | 1 |
| <i>Salvia_pichinchensis</i>            | Benth.                        | MF622166           |          | bird     | calospace   | 1 | 0 | 0 | 0 | 0 | 0 | 0   | 1 | 0 | 0 | 1 | 0 |
| <i>Salvia_pinguifolia</i>              | (Fernald) Wootton & Standl.   | MF622167           |          | bee      | calospace   | 0 | 1 | 0 | 0 | 0 | 0 | 0   | 0 | 1 | 0 | 0 | 0 |
| <i>Salvia_pinnata</i>                  | L.                            | KU563798           |          | bee      | salvia      | 0 | 0 | 0 | 1 | 0 | 0 | 0</ |   |   |   |   |   |



|                     |                    |          |          |          |              |   |   |   |   |   |   |   |   |   |   |   |   |
|---------------------|--------------------|----------|----------|----------|--------------|---|---|---|---|---|---|---|---|---|---|---|---|
| Salvia_wardii       | E.Peter            | MG824418 | MG824287 | bee      | glutinaria   | 0 | 0 | 0 | 0 | 0 | 0 | 1 | 0 | 1 | 0 | 1 | 0 |
| Salvia_whitehousei  | Alziar             | KJ584311 | DQ667320 | bee&bird | heterosphace | 0 | 1 | 0 | 0 | 0 | 0 | 0 | 0 | 0 | 0 | 1 | 0 |
| Salvia_wiedemannii  | Boiss.             |          | KU563817 | bee      | salvia       | 0 | 0 | 0 | 1 | 0 | 0 | 0 | 0 | 0 | 0 | 0 | 1 |
| Salvia_wiiana       | C.L. Xiang         | MG824422 | EU169476 | bee      | glutinaria   | 0 | 0 | 0 | 0 | 0 | 0 | 1 | 0 | 1 | 0 | 0 | 0 |
| Salvia_xalapensis   | Benth.             |          | MF622197 | bee      | calosphace   | 1 | 1 | 0 | 0 | 0 | 0 | 0 | 1 | 1 | 0 | 0 | 0 |
| Salvia_xanthochella | Boiss. ex Benth.   |          | KU563842 | bee      | sclarea      | 0 | 0 | 0 | 1 | 0 | 0 | 0 | 0 | 1 | 1 | 0 | 0 |
| Salvia_yangii       | (Rusby) J.R.I.Wood | MK425902 | MK425945 | bee      | perovskia    | 0 | 0 | 0 | 1 | 0 | 0 | 0 | 0 | 0 | 1 | 0 | 0 |
| Salvia_yosgadensis  | Frey & Borm.       |          | KU563867 | bee      | sclarea      | 0 | 0 | 1 | 0 | 0 | 0 | 0 | 0 | 0 | 0 | 1 | 0 |
| Salvia_yunnanensis  | C.H.Wright         | KT210224 | EF373617 | bee      | glutinaria   | 0 | 0 | 0 | 0 | 0 | 0 | 1 | 1 | 0 | 0 | 1 | 0 |
