# Supplementary material for: Tracking temporal shifts in area, biomes, and pollinators in the radiation of Salvia (sages) across continents: leveraging anchored hybrid enrichment and targeted sequence data
Source: PubMed Central journal article supplement — Am J Bot. 2019 Apr 15;106(4):573–97. doi: 10.1002/ajb2.1268 (PMC6850103; doi:10.1002/ajb2.1268), 2019-04-15
Supplement: AJB2-106-573-s003.pdf [file AJB2-106-573-s003.pdf]

**Appendix S3.** Terminals, proportion of extant species sampled for each clade for BAMM

analyses of *Salvia*. The “*Salvia aegyptiaca* clade” is informally listed here with subgen.

*Zhumeria*. The informal “*Heterosphace*” are listed here under New World “heterosphaceA” or Old World “heterosphaceB”.

1.0

|                            |                 |             |
|----------------------------|-----------------|-------------|
| Melissa_axillaris          | melissa         | 0.5         |
| Melissa_officinalis        | melissa         | 0.5         |
| Lepechinia_leucophylloides | lepechinia      | 0.159090909 |
| Lepechinia_mexicana        | lepechinia      | 0.159090909 |
| Lepechinia_calycina        | lepechinia      | 0.159090909 |
| Lepechinia_lamiifolia      | lepechinia      | 0.159090909 |
| Lepechinia_radula          | lepechinia      | 0.159090909 |
| Lepechinia_caulescens      | lepechinia      | 0.159090909 |
| Lepechinia_chamaedryoides  | lepechinia      | 0.159090909 |
| Salvia_scrophulariifolia   | perovskia       | 0.25        |
| Salvia_yangii              | perovskia       | 0.25        |
| Salvia_rosmarinus          | rosmarinus      | 0.333333333 |
| Salvia_balliana            | subgenus_salvia | 0.632352941 |
| Salvia_marashica           | subgenus_salvia | 0.632352941 |
| Salvia_suffruticosa        | subgenus_salvia | 0.632352941 |
| Salvia_garipensis          | subgenus_salvia | 0.632352941 |
| Salvia_pachystachya        | subgenus_salvia | 0.632352941 |
| Salvia_blepharochlaena     | subgenus_salvia | 0.632352941 |
| Salvia_caespitosa          | subgenus_salvia | 0.632352941 |
| Salvia_wiedemannii         | subgenus_salvia | 0.632352941 |
| Salvia_pinnata             | subgenus_salvia | 0.632352941 |
| Salvia_quezelii            | subgenus_salvia | 0.632352941 |
| Salvia_multicaulis         | subgenus_salvia | 0.632352941 |
| Salvia_recognita           | subgenus_salvia | 0.632352941 |
| Salvia_hydrangea           | subgenus_salvia | 0.632352941 |
| Salvia_maymanica           | subgenus_salvia | 0.632352941 |
| Salvia_bucharica           | subgenus_salvia | 0.632352941 |
| Salvia_huberi              | subgenus_salvia | 0.632352941 |
| Salvia_aramiensis          | subgenus_salvia | 0.632352941 |
| Salvia_tomentosa           | subgenus_salvia | 0.632352941 |
| Salvia_fruticosa           | subgenus_salvia | 0.632352941 |
| Salvia_korolkovii          | subgenus_salvia | 0.632352941 |
| Salvia_officinalis         | subgenus_salvia | 0.632352941 |
| Salvia_aucherii            | subgenus_salvia | 0.632352941 |

|                                      |                               |             |
|--------------------------------------|-------------------------------|-------------|
| Salvia_adenophylla                   | subgenus_salvia               | 0.632352941 |
| Salvia_tchihatcheffii                | subgenus_salvia               | 0.632352941 |
| Salvia_cedronella                    | subgenus_salvia               | 0.632352941 |
| Salvia_heldreichiana                 | subgenus_salvia               | 0.632352941 |
| Salvia_albimaculata                  | subgenus_salvia               | 0.632352941 |
| Salvia_potentillifolia               | subgenus_salvia               | 0.632352941 |
| Salvia_nydeggeri                     | subgenus_salvia               | 0.632352941 |
| Salvia_pisidica                      | subgenus_salvia               | 0.632352941 |
| Salvia_ringens                       | subgenus_salvia               | 0.632352941 |
| Salvia_cadmica                       | subgenus_salvia               | 0.632352941 |
| Salvia_smyrnaea                      | subgenus_salvia               | 0.632352941 |
| Salvia_candelabrum                   | subgenus_salvia               | 0.632352941 |
| Salvia_interrupta                    | subgenus_salvia               | 0.632352941 |
| Salvia_scabiosifolia                 | subgenus_salvia               | 0.632352941 |
| Salvia_euphratica                    | subgenus_salvia               | 0.632352941 |
| Salvia_pseudeuphratica               | subgenus_salvia               | 0.632352941 |
| Salvia_cerinopruinosasubgenus_salvia | subgenus_salvia               | 0.632352941 |
| Salvia_kronenburgii                  | subgenus_salvia               | 0.632352941 |
| Salvia_sericeotomentosa              | subgenus_salvia               | 0.632352941 |
| Salvia_kurdica                       | subgenus_salvia               | 0.632352941 |
| Salvia_cabulica                      | subgenus_salvia               | 0.632352941 |
| Salvia_engelmannii                   | subgenus_heterosphaceA        | 1           |
| Salvia_whitehousei                   | subgenus_heterosphaceA        | 1           |
| Salvia_texana                        | subgenus_heterosphaceA        | 1           |
| Salvia_pentstemonoides               | subgenus_heterosphaceA        | 1           |
| Salvia_henryi                        | subgenus_heterosphaceA        | 1           |
| Salvia_summa                         | subgenus_heterosphaceA        | 1           |
| Salvia_roemeriana                    | subgenus_heterosphaceA        | 1           |
| Salvia_lyrata                        | subgenus_heterosphaceA        | 1           |
| Salvia_albicaulis                    | subgenus_heterosphaceB_africa | 0.757575758 |
| Salvia_chamelaeagnea                 | subgenus_heterosphaceB_africa | 0.757575758 |
| Salvia_africana                      | subgenus_heterosphaceB_africa | 0.757575758 |
| Salvia_thermarum                     | subgenus_heterosphaceB_africa | 0.757575758 |
| Salvia_namaensis                     | subgenus_heterosphaceB_africa | 0.757575758 |
| Salvia_repens                        | subgenus_heterosphaceB_africa | 0.757575758 |
| Salvia_somalensis                    | subgenus_heterosphaceB_africa | 0.757575758 |
| Salvia_africanalutea                 | subgenus_heterosphaceB_africa | 0.757575758 |
| Salvia_lanceolata                    | subgenus_heterosphaceB_africa | 0.757575758 |
| Salvia_scabra                        | subgenus_heterosphaceB_africa | 0.757575758 |
| Salvia_aurita                        | subgenus_heterosphaceB_africa | 0.757575758 |
| Salvia_dolomitica                    | subgenus_heterosphaceB_africa | 0.757575758 |
| Salvia_leucodermis                   | subgenus_heterosphaceB_africa | 0.757575758 |
| Salvia_sessilifolia                  | subgenus_heterosphaceB_africa | 0.757575758 |
| Salvia_stenophylla                   | subgenus_heterosphaceB_africa | 0.757575758 |
| Salvia_schlechteri                   | subgenus_heterosphaceB_africa | 0.757575758 |
| Salvia_muirii                        | subgenus_heterosphaceB_africa | 0.757575758 |

|                                    |                               |             |             |
|------------------------------------|-------------------------------|-------------|-------------|
| Salvia_nilotica                    | subgenus_heterosphaceB_africa | 0.757575758 |             |
| Salvia_napifolia                   | subgenus_heterosphaceB_africa | 0.757575758 |             |
| Salvia_russellii                   | subgenus_heterosphaceB_africa | 0.757575758 |             |
| Salvia_judaica                     | subgenus_heterosphaceB_africa | 0.757575758 |             |
| Salvia_verticillata                | subgenus_heterosphaceB_africa | 0.757575758 |             |
| Salvia_verticillata_subsp_amasiaca | subgenus_heterosphaceB_africa | 0.757575758 | 0.757575758 |
| Salvia_leriifolia                  | subgenus_heterosphaceB_africa | 0.757575758 |             |
| Salvia_taraxacifolia               | subgenus_heterosphaceB_africa | 0.757575758 |             |
| Salvia_candidissima                | subgenus_sclarea              | 0.559322034 |             |
| Salvia_cyanescens                  | subgenus_sclarea              | 0.559322034 |             |
| Salvia_eriophora                   | subgenus_sclarea              | 0.559322034 |             |
| Salvia_chionantha                  | subgenus_sclarea              | 0.559322034 |             |
| Salvia_yosgadensis                 | subgenus_sclarea              | 0.559322034 |             |
| Salvia_microstegia                 | subgenus_sclarea              | 0.559322034 |             |
| Salvia_argentea                    | subgenus_sclarea              | 0.559322034 |             |
| Salvia_poculata                    | subgenus_sclarea              | 0.559322034 |             |
| Salvia_aethiopis                   | subgenus_sclarea              | 0.559322034 |             |
| Salvia_brachyantha                 | subgenus_sclarea              | 0.559322034 |             |
| Salvia_frigida                     | subgenus_sclarea              | 0.559322034 |             |
| Salvia_indica                      | subgenus_sclarea              | 0.559322034 |             |
| Salvia_sclarea                     | subgenus_sclarea              | 0.559322034 |             |
| Salvia_atropatana                  | subgenus_sclarea              | 0.559322034 |             |
| Salvia_xanthocheila                | subgenus_sclarea              | 0.559322034 |             |
| Salvia_anatolica                   | subgenus_sclarea              | 0.559322034 |             |
| Salvia_modesta                     | subgenus_sclarea              | 0.559322034 |             |
| Salvia_chloroleuca                 | subgenus_sclarea              | 0.559322034 |             |
| Salvia_vermifolia                  | subgenus_sclarea              | 0.559322034 |             |
| Salvia_staminea                    | subgenus_sclarea              | 0.559322034 |             |
| Salvia_reuteriana                  | subgenus_sclarea              | 0.559322034 |             |
| Salvia_sahendica                   | subgenus_sclarea              | 0.559322034 |             |
| Salvia_hypoleuca                   | subgenus_sclarea              | 0.559322034 |             |
| Salvia_veneris                     | subgenus_sclarea              | 0.559322034 |             |
| Salvia_cassia                      | subgenus_sclarea              | 0.559322034 |             |
| Salvia_tingitana                   | subgenus_sclarea              | 0.559322034 |             |
| Salvia_absconditiflora             | subgenus_sclarea              | 0.559322034 |             |
| Salvia_chrysophylla                | subgenus_sclarea              | 0.559322034 |             |
| Salvia_tobeyi                      | subgenus_sclarea              | 0.559322034 |             |
| Salvia_limbata                     | subgenus_sclarea              | 0.559322034 |             |
| Salvia_ariana                      | subgenus_sclarea              | 0.559322034 |             |
| Salvia_syriaca                     | subgenus_sclarea              | 0.559322034 |             |
| Salvia_schimperi                   | subgenus_sclarea              | 0.559322034 |             |
| Salvia_persepolitana               | subgenus_sclarea              | 0.559322034 |             |
| Salvia_sarawschanica               | subgenus_sclarea              | 0.559322034 |             |
| Salvia_sharifii                    | subgenus_sclarea              | 0.559322034 |             |
| Salvia_moorcroftiana               | subgenus_sclarea              | 0.559322034 |             |
| Salvia_palaestina                  | subgenus_sclarea              | 0.559322034 |             |

|                         |                     |             |
|-------------------------|---------------------|-------------|
| Salvia_rhytidea         | subgenus_sclarea    | 0.559322034 |
| Salvia_dominica         | subgenus_sclarea    | 0.559322034 |
| Salvia_deserta          | subgenus_sclarea    | 0.559322034 |
| Salvia_sylvestris       | subgenus_sclarea    | 0.559322034 |
| Salvia_sclareoides      | subgenus_sclarea    | 0.559322034 |
| Salvia_viscosa          | subgenus_sclarea    | 0.559322034 |
| Salvia_adenocaulon      | subgenus_sclarea    | 0.559322034 |
| Salvia_amplexicaulis    | subgenus_sclarea    | 0.559322034 |
| Salvia_dichroantha      | subgenus_sclarea    | 0.559322034 |
| Salvia_hierosolymitana  | subgenus_sclarea    | 0.559322034 |
| Salvia_juriscii         | subgenus_sclarea    | 0.559322034 |
| Salvia_nutans           | subgenus_sclarea    | 0.559322034 |
| Salvia_pratensis        | subgenus_sclarea    | 0.559322034 |
| Salvia_disermas         | subgenus_sclarea    | 0.559322034 |
| Salvia_radula           | subgenus_sclarea    | 0.559322034 |
| Salvia_austriaca        | subgenus_sclarea    | 0.559322034 |
| Salvia_virgata          | subgenus_sclarea    | 0.559322034 |
| Salvia_merjamie         | subgenus_sclarea    | 0.559322034 |
| Salvia_verbenaca        | subgenus_sclarea    | 0.559322034 |
| Salvia_lanigera         | subgenus_sclarea    | 0.559322034 |
| Salvia_broussonetii     | subgenus_sclarea    | 0.559322034 |
| Salvia_canariensis      | subgenus_sclarea    | 0.559322034 |
| Salvia_montbretii       | subgenus_sclarea    | 0.559322034 |
| Salvia_phlomoides       | subgenus_sclarea    | 0.559322034 |
| Salvia_hypargeia        | subgenus_sclarea    | 0.559322034 |
| Salvia_viridis          | subgenus_sclarea    | 0.559322034 |
| Salvia_lanata           | subgenus_sclarea    | 0.559322034 |
| Salvia_daghestanica     | subgenus_sclarea    | 0.559322034 |
| Salvia_handelii         | subgenus_glutinaria | 0.783505155 |
| Salvia_lankongensis     | subgenus_glutinaria | 0.783505155 |
| Salvia_subpalmatinervis | subgenus_glutinaria | 0.783505155 |
| Salvia_aerea            | subgenus_glutinaria | 0.783505155 |
| Salvia_cyclostegia      | subgenus_glutinaria | 0.783505155 |
| Salvia_atrorubra        | subgenus_glutinaria | 0.783505155 |
| Salvia_mairei           | subgenus_glutinaria | 0.783505155 |
| Salvia_sikkimensis      | subgenus_glutinaria | 0.783505155 |
| Salvia_cynica           | subgenus_glutinaria | 0.783505155 |
| Salvia_kiaometiensis    | subgenus_glutinaria | 0.783505155 |
| Salvia_omeiana          | subgenus_glutinaria | 0.783505155 |
| Salvia_paohsingensis    | subgenus_glutinaria | 0.783505155 |
| Salvia_wuana            | subgenus_glutinaria | 0.783505155 |
| Salvia_heterochroa      | subgenus_glutinaria | 0.783505155 |
| Salvia_brachyloma       | subgenus_glutinaria | 0.783505155 |
| Salvia_evansiana        | subgenus_glutinaria | 0.783505155 |
| Salvia_hupehensis       | subgenus_glutinaria | 0.783505155 |
| Salvia_pogonochila      | subgenus_glutinaria | 0.783505155 |

|                       |                     |             |
|-----------------------|---------------------|-------------|
| Salvia_smithii        | subgenus_glutinaria | 0.783505155 |
| Salvia_bifidocalyx    | subgenus_glutinaria | 0.783505155 |
| Salvia_digitaloides   | subgenus_glutinaria | 0.783505155 |
| Salvia_przewalskii    | subgenus_glutinaria | 0.783505155 |
| Salvia_hians          | subgenus_glutinaria | 0.783505155 |
| Salvia_bulleyana      | subgenus_glutinaria | 0.783505155 |
| Salvia_flava          | subgenus_glutinaria | 0.783505155 |
| Salvia_maximowicziana | subgenus_glutinaria | 0.783505155 |
| Salvia_brevilabra     | subgenus_glutinaria | 0.783505155 |
| Salvia_prattii        | subgenus_glutinaria | 0.783505155 |
| Salvia_potaninii      | subgenus_glutinaria | 0.783505155 |
| Salvia_wardii         | subgenus_glutinaria | 0.783505155 |
| Salvia_campanulata    | subgenus_glutinaria | 0.783505155 |
| Salvia_hylocharis     | subgenus_glutinaria | 0.783505155 |
| Salvia_atropurpurea   | subgenus_glutinaria | 0.783505155 |
| Salvia_castanea       | subgenus_glutinaria | 0.783505155 |
| Salvia_schizochila    | subgenus_glutinaria | 0.783505155 |
| Salvia_glabrescens    | subgenus_glutinaria | 0.783505155 |
| Salvia_nipponica      | subgenus_glutinaria | 0.783505155 |
| Salvia_glutinosa      | subgenus_glutinaria | 0.783505155 |
| Salvia_nubicola       | subgenus_glutinaria | 0.783505155 |
| Salvia_koyamae        | subgenus_glutinaria | 0.783505155 |
| Salvia_roborowskii    | subgenus_glutinaria | 0.783505155 |
| Salvia_tricuspis      | subgenus_glutinaria | 0.783505155 |
| Salvia_umbratica      | subgenus_glutinaria | 0.783505155 |
| Salvia_substolonifera | subgenus_glutinaria | 0.783505155 |
| Salvia_trijuga        | subgenus_glutinaria | 0.783505155 |
| Salvia_chienii        | subgenus_glutinaria | 0.783505155 |
| Salvia_qimenensis     | subgenus_glutinaria | 0.783505155 |
| Salvia_japonica       | subgenus_glutinaria | 0.783505155 |
| Salvia_chinensis      | subgenus_glutinaria | 0.783505155 |
| Salvia_liguliloba     | subgenus_glutinaria | 0.783505155 |
| Salvia_appendiculata  | subgenus_glutinaria | 0.783505155 |
| Salvia_chunganensis   | subgenus_glutinaria | 0.783505155 |
| Salvia_baimaensis     | subgenus_glutinaria | 0.783505155 |
| Salvia_pygmaea        | subgenus_glutinaria | 0.783505155 |
| Salvia_kiangsiensis   | subgenus_glutinaria | 0.783505155 |
| Salvia_scapiformis    | subgenus_glutinaria | 0.783505155 |
| Salvia_cavaleriei     | subgenus_glutinaria | 0.783505155 |
| Salvia_akiensis       | subgenus_glutinaria | 0.783505155 |
| Salvia_omerocalyx     | subgenus_glutinaria | 0.783505155 |
| Salvia_arisanensis    | subgenus_glutinaria | 0.783505155 |
| Salvia_lutescens      | subgenus_glutinaria | 0.783505155 |
| Salvia_ranzaniana     | subgenus_glutinaria | 0.783505155 |
| Salvia_isensis        | subgenus_glutinaria | 0.783505155 |
| Salvia_bowleyana      | subgenus_glutinaria | 0.783505155 |

|                                                 |                                   |             |
|-------------------------------------------------|-----------------------------------|-------------|
| Salvia_sinica                                   | subgenus_glutinaria               | 0.783505155 |
| Salvia_dabieshanensis                           | subgenus_glutinaria               | 0.783505155 |
| Salvia_paramiltiorrhiza                         | subgenus_glutinaria               | 0.783505155 |
| Salvia_honania                                  | subgenus_glutinaria               | 0.783505155 |
| Salvia_meiliensis                               | subgenus_glutinaria               | 0.783505155 |
| Salvia_miltiorrhiza                             | subgenus_glutinaria               | 0.783505155 |
| Salvia_nanchuanensis                            | subgenus_glutinaria               | 0.783505155 |
| Salvia_plectranthoides                          | subgenus_glutinaria               | 0.783505155 |
| Salvia_yunnanensis                              | subgenus_glutinaria               | 0.783505155 |
| Salvia_plebeia                                  | subgenus_glutinaria               | 0.783505155 |
| Salvia_petrophila                               | subgenus_glutinaria               | 0.783505155 |
| Salvia_sonchifolia                              | subgenus_glutinaria               | 0.783505155 |
| Salvia_zhumeria                                 | subgenus_zhumeria                 | 0.35483871  |
| Salvia_herbanica                                | subgenus_zhumeria                 | 0.35483871  |
| Salvia_deserti                                  | subgenus_zhumeria                 | 0.35483871  |
| Salvia_areysiana                                | subgenus_zhumeria                 | 0.35483871  |
| Salvia_bariensis                                | subgenus_zhumeria                 | 0.35483871  |
| Salvia_geminata                                 | subgenus_zhumeria                 | 0.35483871  |
| Salvia_trichocalycina                           | subgenus_zhumeria                 | 0.35483871  |
| Salvia_aristata                                 | subgenus_zhumeria                 | 0.35483871  |
| Salvia_vvedenskii                               | subgenus_zhumeria                 | 0.35483871  |
| Salvia_majdae                                   | subgenus_zhumeria                 | 0.35483871  |
| Salvia_margaritae                               | subgenus_zhumeria                 | 0.35483871  |
| Salvia_dorystaechas                             | dorystaechas                      | 1           |
| Salvia_dianthera                                | meriandra                         | 0.333333333 |
| Salvia_munzii                                   | subgenus_audibertia               | 1           |
| Salvia_vaseyi                                   | subgenus_audibertia               | 1           |
| Salvia_eremostachya                             | subgenus_audibertia               | 1           |
| Salvia_apiana                                   | subgenus_audibertia               | 1           |
| Salvia_clevelandii                              | subgenus_audibertia               | 1           |
| Salvia_mellifera                                | subgenus_audibertia               | 1           |
| Salvia_brandegeei                               | subgenus_audibertia               | 1           |
| Salvia_dorrii                                   | subgenus_audibertia               | 1           |
| Salvia_pachyphylla                              | subgenus_audibertia               | 1           |
| Salvia_mohavensis                               | subgenus_audibertia               | 1           |
| Salvia_sonomensis                               | subgenus_audibertia               | 1           |
| Salvia_spathacea                                | subgenus_audibertia               | 1           |
| Salvia_chionoeplica                             | subgenus_audibertia               | 1           |
| Salvia_leucophylla                              | subgenus_audibertia               | 1           |
| Salvia_columbariae                              | subgenus_audibertia               | 1           |
| Salvia_californica                              | subgenus_audibertia               | 1           |
| Salvia_greatae                                  | subgenus_audibertia               | 1           |
| Salvia_funerea                                  | subgenus_audibertia               | 1           |
| Salvia_carduacea                                | subgenus_audibertia               | 1           |
| Salvia_longispicata                             | subgenus_calosphace_sensu_stricto | 0.441979522 |
| Salvia_sapineasubgenus_calosphace_sensu_stricto |                                   | 0.441979522 |

|                         |                                   |             |
|-------------------------|-----------------------------------|-------------|
| Salvia_myriantha        | subgenus_calosphace_sensu_stricto | 0.441979522 |
| Salvia_languidula       | subgenus_calosphace_sensu_stricto | 0.441979522 |
| Salvia_confertispicata  | subgenus_calosphace_sensu_stricto | 0.441979522 |
| Salvia_mexicana         | subgenus_calosphace_sensu_stricto | 0.441979522 |
| Salvia_angulata         | subgenus_calosphace_sensu_stricto | 0.441979522 |
| Salvia_xalapensis       | subgenus_calosphace_sensu_stricto | 0.441979522 |
| Salvia_santanae         | subgenus_calosphace_sensu_stricto | 0.441979522 |
| Salvia_amarissima       | subgenus_calosphace_sensu_stricto | 0.441979522 |
| Salvia_ibugana          | subgenus_calosphace_sensu_stricto | 0.441979522 |
| Salvia_leucantha        | subgenus_calosphace_sensu_stricto | 0.441979522 |
| Salvia_peninsularis     | subgenus_calosphace_sensu_stricto | 0.441979522 |
| Salvia_palmeri          | subgenus_calosphace_sensu_stricto | 0.441979522 |
| Salvia_rosei            | subgenus_calosphace_sensu_stricto | 0.441979522 |
| Salvia_guadalajarensis  | subgenus_calosphace_sensu_stricto | 0.441979522 |
| Salvia_muscarioides     | subgenus_calosphace_sensu_stricto | 0.441979522 |
| Salvia_agnes            | subgenus_calosphace_sensu_stricto | 0.441979522 |
| Salvia_cryptodonta      | subgenus_calosphace_sensu_stricto | 0.441979522 |
| Salvia_lavanduloides    | subgenus_calosphace_sensu_stricto | 0.441979522 |
| Salvia_moniliformis     | subgenus_calosphace_sensu_stricto | 0.441979522 |
| Salvia_heterofolia      | subgenus_calosphace_sensu_stricto | 0.441979522 |
| Salvia_rzedowskii       | subgenus_calosphace_sensu_stricto | 0.441979522 |
| Salvia_helianthemifolia | subgenus_calosphace_sensu_stricto | 0.441979522 |
| Salvia_remota           | subgenus_calosphace_sensu_stricto | 0.441979522 |
| Salvia_stachyoides      | subgenus_calosphace_sensu_stricto | 0.441979522 |
| Salvia_miniatasubgenus  | subgenus_calosphace_sensu_stricto | 0.441979522 |
| Salvia_arbuscula        | subgenus_calosphace_sensu_stricto | 0.441979522 |
| Salvia_iodantha         | subgenus_calosphace_sensu_stricto | 0.441979522 |
| Salvia_polystachya      | subgenus_calosphace_sensu_stricto | 0.441979522 |
| Salvia_littae           | subgenus_calosphace_sensu_stricto | 0.441979522 |
| Salvia_connivens        | subgenus_calosphace_sensu_stricto | 0.441979522 |
| Salvia_trichostephana   | subgenus_calosphace_sensu_stricto | 0.441979522 |
| Salvia_plurispicata     | subgenus_calosphace_sensu_stricto | 0.441979522 |
| Salvia_curviflora       | subgenus_calosphace_sensu_stricto | 0.441979522 |
| Salvia_areolata         | subgenus_calosphace_sensu_stricto | 0.441979522 |
| Salvia_ionocalyx        | subgenus_calosphace_sensu_stricto | 0.441979522 |
| Salvia_chiapiensis      | subgenus_calosphace_sensu_stricto | 0.441979522 |
| Salvia_filipes          | subgenus_calosphace_sensu_stricto | 0.441979522 |
| Salvia_tonaticensis     | subgenus_calosphace_sensu_stricto | 0.441979522 |
| Salvia_alboresea        | subgenus_calosphace_sensu_stricto | 0.441979522 |
| Salvia_pichinchensis    | subgenus_calosphace_sensu_stricto | 0.441979522 |
| Salvia_pauciserrata     | subgenus_calosphace_sensu_stricto | 0.441979522 |
| Salvia_bogotensis       | subgenus_calosphace_sensu_stricto | 0.441979522 |
| Salvia_sphacelioides    | subgenus_calosphace_sensu_stricto | 0.441979522 |
| Salvia_sordida          | subgenus_calosphace_sensu_stricto | 0.441979522 |
| Salvia_rufula           | subgenus_calosphace_sensu_stricto | 0.441979522 |
| Salvia_tolimensis       | subgenus_calosphace_sensu_stricto | 0.441979522 |

|                        |                                   |             |
|------------------------|-----------------------------------|-------------|
| Salvia_cuatrecasana    | subgenus_calosphace_sensu_stricto | 0.441979522 |
| Salvia_florida         | subgenus_calosphace_sensu_stricto | 0.441979522 |
| Salvia_tortuosa        | subgenus_calosphace_sensu_stricto | 0.441979522 |
| Salvia_amplifrons      | subgenus_calosphace_sensu_stricto | 0.441979522 |
| Salvia_raymondii       | subgenus_calosphace_sensu_stricto | 0.441979522 |
| Salvia_cyanicalyx      | subgenus_calosphace_sensu_stricto | 0.441979522 |
| Salvia_densiflora      | subgenus_calosphace_sensu_stricto | 0.441979522 |
| Salvia_tuerckheimii    | subgenus_calosphace_sensu_stricto | 0.441979522 |
| Salvia_pansamalensis   | subgenus_calosphace_sensu_stricto | 0.441979522 |
| Salvia_carnea          | subgenus_calosphace_sensu_stricto | 0.441979522 |
| Salvia_palealis        | subgenus_calosphace_sensu_stricto | 0.441979522 |
| Salvia_simulans        | subgenus_calosphace_sensu_stricto | 0.441979522 |
| Salvia_leptostachys    | subgenus_calosphace_sensu_stricto | 0.441979522 |
| Salvia_rhyacophila     | subgenus_calosphace_sensu_stricto | 0.441979522 |
| Salvia_hispanica       | subgenus_calosphace_sensu_stricto | 0.441979522 |
| Salvia_personata       | subgenus_calosphace_sensu_stricto | 0.441979522 |
| Salvia_tiliifolia      | subgenus_calosphace_sensu_stricto | 0.441979522 |
| Salvia_jorgehintoniana | subgenus_calosphace_sensu_stricto | 0.441979522 |
| Salvia_nervata         | subgenus_calosphace_sensu_stricto | 0.441979522 |
| Salvia_tubifera        | subgenus_calosphace_sensu_stricto | 0.441979522 |
| Salvia_pennellii       | subgenus_calosphace_sensu_stricto | 0.441979522 |
| Salvia_richardsonii    | subgenus_calosphace_sensu_stricto | 0.441979522 |
| Salvia_farinacea       | subgenus_calosphace_sensu_stricto | 0.441979522 |
| Salvia_caudata         | subgenus_calosphace_sensu_stricto | 0.441979522 |
| Salvia_diegoae         | subgenus_calosphace_sensu_stricto | 0.441979522 |
| Salvia_vazquezii       | subgenus_calosphace_sensu_stricto | 0.441979522 |
| Salvia_gravida         | subgenus_calosphace_sensu_stricto | 0.441979522 |
| Salvia_longistyla      | subgenus_calosphace_sensu_stricto | 0.441979522 |
| Salvia_brevipes        | subgenus_calosphace_sensu_stricto | 0.441979522 |
| Salvia_cerradicola     | subgenus_calosphace_sensu_stricto | 0.441979522 |
| Salvia_melissiflora    | subgenus_calosphace_sensu_stricto | 0.441979522 |
| Salvia_articulata      | subgenus_calosphace_sensu_stricto | 0.441979522 |
| Salvia_hilarii         | subgenus_calosphace_sensu_stricto | 0.441979522 |
| Salvia_alba            | subgenus_calosphace_sensu_stricto | 0.441979522 |
| Salvia_graciliramulosa | subgenus_calosphace_sensu_stricto | 0.441979522 |
| Salvia_durifolia       | subgenus_calosphace_sensu_stricto | 0.441979522 |
| Salvia_haenkei         | subgenus_calosphace_sensu_stricto | 0.441979522 |
| Salvia_platystoma      | subgenus_calosphace_sensu_stricto | 0.441979522 |
| Salvia_oxyphora        | subgenus_calosphace_sensu_stricto | 0.441979522 |
| Salvia_rusbyi          | subgenus_calosphace_sensu_stricto | 0.441979522 |
| Salvia_formosa         | subgenus_calosphace_sensu_stricto | 0.441979522 |
| Salvia_sarmentosa      | subgenus_calosphace_sensu_stricto | 0.441979522 |
| Salvia_dombeyi         | subgenus_calosphace_sensu_stricto | 0.441979522 |
| Salvia_sophrona        | subgenus_calosphace_sensu_stricto | 0.441979522 |
| Salvia_stachydifolia   | subgenus_calosphace_sensu_stricto | 0.441979522 |
| Salvia_atrocyanea      | subgenus_calosphace_sensu_stricto | 0.441979522 |

|                        |                                   |             |
|------------------------|-----------------------------------|-------------|
| Salvia_pallida         | subgenus_calosphace_sensu_stricto | 0.441979522 |
| Salvia_splendens       | subgenus_calosphace_sensu_stricto | 0.441979522 |
| Salvia_exserta         | subgenus_calosphace_sensu_stricto | 0.441979522 |
| Salvia_praeclara       | subgenus_calosphace_sensu_stricto | 0.441979522 |
| Salvia_subrotunda      | subgenus_calosphace_sensu_stricto | 0.441979522 |
| Salvia_tomentella      | subgenus_calosphace_sensu_stricto | 0.441979522 |
| Salvia_grewiifolia     | subgenus_calosphace_sensu_stricto | 0.441979522 |
| Salvia_rypara          | subgenus_calosphace_sensu_stricto | 0.441979522 |
| Salvia_sucrensis       | subgenus_calosphace_sensu_stricto | 0.441979522 |
| Salvia_orbignaei       | subgenus_calosphace_sensu_stricto | 0.441979522 |
| Salvia_confertiflora   | subgenus_calosphace_sensu_stricto | 0.441979522 |
| Salvia_minarum         | subgenus_calosphace_sensu_stricto | 0.441979522 |
| Salvia_nervosa         | subgenus_calosphace_sensu_stricto | 0.441979522 |
| Salvia_guaranitica     | subgenus_calosphace_sensu_stricto | 0.441979522 |
| Salvia_scabrida        | subgenus_calosphace_sensu_stricto | 0.441979522 |
| Salvia_herbacea        | subgenus_calosphace_sensu_stricto | 0.441979522 |
| Salvia_infuscata       | subgenus_calosphace_sensu_stricto | 0.441979522 |
| Salvia_leucochlamys    | subgenus_calosphace_sensu_stricto | 0.441979522 |
| Salvia_urica           | subgenus_calosphace_sensu_stricto | 0.441979522 |
| Salvia_perlonga        | subgenus_calosphace_sensu_stricto | 0.441979522 |
| Salvia_praestans       | subgenus_calosphace_sensu_stricto | 0.441979522 |
| Salvia_striata         | subgenus_calosphace_sensu_stricto | 0.441979522 |
| Salvia_tubiflora       | subgenus_calosphace_sensu_stricto | 0.441979522 |
| Salvia_squalens        | subgenus_calosphace_sensu_stricto | 0.441979522 |
| Salvia_oppositiflora   | subgenus_calosphace_sensu_stricto | 0.441979522 |
| Salvia_lobbii          | subgenus_calosphace_sensu_stricto | 0.441979522 |
| Salvia_speciosa        | subgenus_calosphace_sensu_stricto | 0.441979522 |
| Salvia_hirtella        | subgenus_calosphace_sensu_stricto | 0.441979522 |
| Salvia_sprucei         | subgenus_calosphace_sensu_stricto | 0.441979522 |
| Salvia_rhombifolia     | subgenus_calosphace_sensu_stricto | 0.441979522 |
| Salvia_angustiarum     | subgenus_calosphace_sensu_stricto | 0.441979522 |
| Salvia_coccinea        | subgenus_calosphace_sensu_stricto | 0.441979522 |
| Salvia_jaimehintoniana | subgenus_calosphace_sensu_stricto | 0.441979522 |
| Salvia_reflexa         | subgenus_calosphace_sensu_stricto | 0.441979522 |
| Salvia_blepharophylla  | subgenus_calosphace_sensu_stricto | 0.441979522 |
| Salvia_sharpii         | subgenus_calosphace_sensu_stricto | 0.441979522 |
| Salvia_prasiifolia     | subgenus_calosphace_sensu_stricto | 0.441979522 |
| Salvia_reptans         | subgenus_calosphace_sensu_stricto | 0.441979522 |
| Salvia_chionophylla    | subgenus_calosphace_sensu_stricto | 0.441979522 |
| Salvia_leptophylla     | subgenus_calosphace_sensu_stricto | 0.441979522 |
| Salvia_azurea          | subgenus_calosphace_sensu_stricto | 0.441979522 |
| Salvia_buchananii      | subgenus_calosphace_sensu_stricto | 0.441979522 |
| Salvia_cualensis       | subgenus_calosphace_sensu_stricto | 0.441979522 |
| Salvia_cedrosensis     | subgenus_calosphace_sensu_stricto | 0.441979522 |
| Salvia_gachantivana    | subgenus_calosphace_sensu_stricto | 0.441979522 |
| Salvia_melaleuca       | subgenus_calosphace_sensu_stricto | 0.441979522 |

|                        |                                   |             |
|------------------------|-----------------------------------|-------------|
| Salvia_gracilipes      | subgenus_calosphace_sensu_stricto | 0.441979522 |
| Salvia_erythrostoma    | subgenus_calosphace_sensu_stricto | 0.441979522 |
| Salvia_rubescens       | subgenus_calosphace_sensu_stricto | 0.441979522 |
| Salvia_amethystina     | subgenus_calosphace_sensu_stricto | 0.441979522 |
| Salvia_inconspicua     | subgenus_calosphace_sensu_stricto | 0.441979522 |
| Salvia_protracta       | subgenus_calosphace_sensu_stricto | 0.441979522 |
| Salvia_thyrsiflora     | subgenus_calosphace_sensu_stricto | 0.441979522 |
| Salvia_nepetoides      | subgenus_calosphace_sensu_stricto | 0.441979522 |
| Salvia_chapalensis     | subgenus_calosphace_sensu_stricto | 0.441979522 |
| Salvia_amosana         | subgenus_calosphace_sensu_stricto | 0.441979522 |
| Salvia_quercetorum     | subgenus_calosphace_sensu_stricto | 0.441979522 |
| Salvia_ramamoorthyana  | subgenus_calosphace_sensu_stricto | 0.441979522 |
| Salvia_aequidistans    | subgenus_calosphace_sensu_stricto | 0.441979522 |
| Salvia_sphacelifolia   | subgenus_calosphace_sensu_stricto | 0.441979522 |
| Salvia_tepicensis      | subgenus_calosphace_sensu_stricto | 0.441979522 |
| Salvia_lasiantha       | subgenus_calosphace_sensu_stricto | 0.441979522 |
| Salvia_ramosa          | subgenus_calosphace_sensu_stricto | 0.441979522 |
| Salvia_corrugata       | subgenus_calosphace_sensu_stricto | 0.441979522 |
| Salvia_rupicola        | subgenus_calosphace_sensu_stricto | 0.441979522 |
| Salvia_melissodora     | subgenus_calosphace_sensu_stricto | 0.441979522 |
| Salvia_aspera          | subgenus_calosphace_sensu_stricto | 0.441979522 |
| Salvia_semiatrata      | subgenus_calosphace_sensu_stricto | 0.441979522 |
| Salvia_chamaedryoides  | subgenus_calosphace_sensu_stricto | 0.441979522 |
| Salvia_thymoides       | subgenus_calosphace_sensu_stricto | 0.441979522 |
| Salvia_breviflora      | subgenus_calosphace_sensu_stricto | 0.441979522 |
| Salvia_keerlii         | subgenus_calosphace_sensu_stricto | 0.441979522 |
| Salvia_discolor        | subgenus_calosphace_sensu_stricto | 0.441979522 |
| Salvia_leucocephala    | subgenus_calosphace_sensu_stricto | 0.441979522 |
| Salvia_galloana        | subgenus_calosphace_sensu_stricto | 0.441979522 |
| Salvia_dorisiana       | subgenus_calosphace_sensu_stricto | 0.441979522 |
| Salvia_involucrata     | subgenus_calosphace_sensu_stricto | 0.441979522 |
| Salvia_karwinskii      | subgenus_calosphace_sensu_stricto | 0.441979522 |
| Salvia_holwayi_2       | subgenus_calosphace_sensu_stricto | 0.441979522 |
| Salvia_pulchella       | subgenus_calosphace_sensu_stricto | 0.441979522 |
| Salvia_univerticillata | subgenus_calosphace_sensu_stricto | 0.441979522 |
| Salvia_holwayi         | subgenus_calosphace_sensu_stricto | 0.441979522 |
| Salvia_wagneriana      | subgenus_calosphace_sensu_stricto | 0.441979522 |
| Salvia_lophanthoides   | subgenus_calosphace_sensu_stricto | 0.441979522 |
| Salvia_rubiginosa      | subgenus_calosphace_sensu_stricto | 0.441979522 |
| Salvia_compsostachys   | subgenus_calosphace_sensu_stricto | 0.441979522 |
| Salvia_bupleuroides    | subgenus_calosphace_sensu_stricto | 0.441979522 |
| Salvia_verecunda       | subgenus_calosphace_sensu_stricto | 0.441979522 |
| Salvia_langlassei      | subgenus_calosphace_sensu_stricto | 0.441979522 |
| Salvia_sanctaeluciae   | subgenus_calosphace_sensu_stricto | 0.441979522 |
| Salvia_lasiocephala    | subgenus_calosphace_sensu_stricto | 0.441979522 |
| Salvia_mexicae         | subgenus_calosphace_sensu_stricto | 0.441979522 |

|                             |                                   |             |
|-----------------------------|-----------------------------------|-------------|
| Salvia_nitida               | subgenus_calosphace_sensu_stricto | 0.441979522 |
| Salvia_adenophora           | subgenus_calosphace_sensu_stricto | 0.441979522 |
| Salvia_disjuncta            | subgenus_calosphace_sensu_stricto | 0.441979522 |
| Salvia_madrensis            | subgenus_calosphace_sensu_stricto | 0.441979522 |
| Salvia_divinorum            | subgenus_calosphace_sensu_stricto | 0.441979522 |
| Salvia_venulosa             | subgenus_calosphace_sensu_stricto | 0.441979522 |
| Salvia_albocaerulea         | subgenus_calosphace_sensu_stricto | 0.441979522 |
| Salvia_rostellata           | subgenus_calosphace_sensu_stricto | 0.441979522 |
| Salvia_prunifolia           | subgenus_calosphace_sensu_stricto | 0.441979522 |
| Salvia_sinaloensis          | subgenus_calosphace_sensu_stricto | 0.441979522 |
| Salvia_misella              | subgenus_calosphace_sensu_stricto | 0.441979522 |
| Salvia_occidentalis         | subgenus_calosphace_sensu_stricto | 0.441979522 |
| Salvia_bullulata            | subgenus_calosphace_sensu_stricto | 0.441979522 |
| Salvia_styphelus            | subgenus_calosphace_sensu_stricto | 0.441979522 |
| Salvia_clinopodioides       | subgenus_calosphace_sensu_stricto | 0.441979522 |
| Salvia_glechomifolia        | subgenus_calosphace_sensu_stricto | 0.441979522 |
| Salvia_setulosa             | subgenus_calosphace_sensu_stricto | 0.441979522 |
| Salvia_mocinoi              | subgenus_calosphace_sensu_stricto | 0.441979522 |
| Salvia_forreri              | subgenus_calosphace_sensu_stricto | 0.441979522 |
| Salvia_prunelloides         | subgenus_calosphace_sensu_stricto | 0.441979522 |
| Salvia_filifolia            | subgenus_calosphace_sensu_stricto | 0.441979522 |
| Salvia_laevis               | subgenus_calosphace_sensu_stricto | 0.441979522 |
| Salvia_nana                 | subgenus_calosphace_sensu_stricto | 0.441979522 |
| Salvia_pusilla              | subgenus_calosphace_sensu_stricto | 0.441979522 |
| Salvia_cinnabarina          | subgenus_calosphace_sensu_stricto | 0.441979522 |
| Salvia_elegans              | subgenus_calosphace_sensu_stricto | 0.441979522 |
| Salvia_ovalifolia           | subgenus_calosphace_sensu_stricto | 0.441979522 |
| Salvia_procurrans           | subgenus_calosphace_sensu_stricto | 0.441979522 |
| Salvia_congestiflora        | subgenus_calosphace_sensu_stricto | 0.441979522 |
| Salvia_uliginosa            | subgenus_calosphace_sensu_stricto | 0.441979522 |
| Salvia_lachnostachys        | subgenus_calosphace_sensu_stricto | 0.441979522 |
| Salvia_hintonii             | subgenus_calosphace_sensu_stricto | 0.441979522 |
| Salvia_textitlana           | subgenus_calosphace_sensu_stricto | 0.441979522 |
| Salvia_manantlanensis       | subgenus_calosphace_sensu_stricto | 0.441979522 |
| Salvia_tricuspidata         | subgenus_calosphace_sensu_stricto | 0.441979522 |
| Salvia_fruticulosa          | subgenus_calosphace_sensu_stricto | 0.441979522 |
| Salvia_parryi               | subgenus_calosphace_sensu_stricto | 0.441979522 |
| Salvia_cardinalis           | subgenus_calosphace_sensu_stricto | 0.441979522 |
| Salvia_fulgens              | subgenus_calosphace_sensu_stricto | 0.441979522 |
| Salvia_gesneriiflora        | subgenus_calosphace_sensu_stricto | 0.441979522 |
| Salvia_lineata              | subgenus_calosphace_sensu_stricto | 0.441979522 |
| Salvia_stolonifera          | subgenus_calosphace_sensu_stricto | 0.441979522 |
| Salvia_purpurea             | subgenus_calosphace_sensu_stricto | 0.441979522 |
| Salvia_microphylla          | subgenus_calosphace_sensu_stricto | 0.441979522 |
| Salvia_microphylla_neurepia | subgenus_calosphace_sensu_stricto | 0.441979522 |
| Salvia_coahuilensis         | subgenus_calosphace_sensu_stricto | 0.441979522 |

|                        |                                   |             |
|------------------------|-----------------------------------|-------------|
| Salvia_greggii         | subgenus_calosphace_sensu_stricto | 0.441979522 |
| Salvia_muelleri        | subgenus_calosphace_sensu_stricto | 0.441979522 |
| Salvia_lycioides       | subgenus_calosphace_sensu_stricto | 0.441979522 |
| Salvia_villosa         | subgenus_calosphace_sensu_stricto | 0.441979522 |
| Salvia_podadena        | subgenus_calosphace_sensu_stricto | 0.441979522 |
| Salvia_tehuacana       | subgenus_calosphace_sensu_stricto | 0.441979522 |
| Salvia_concolor        | subgenus_calosphace_sensu_stricto | 0.441979522 |
| Salvia_flaccidifolia   | subgenus_calosphace_sensu_stricto | 0.441979522 |
| Salvia_recurva         | subgenus_calosphace_sensu_stricto | 0.441979522 |
| Salvia_acerifolia      | subgenus_calosphace_sensu_stricto | 0.441979522 |
| Salvia_purpusii        | subgenus_calosphace_sensu_stricto | 0.441979522 |
| Salvia_hidalgensis     | subgenus_calosphace_sensu_stricto | 0.441979522 |
| Salvia_betulifolia     | subgenus_calosphace_sensu_stricto | 0.441979522 |
| Salvia_pubescens       | subgenus_calosphace_sensu_stricto | 0.441979522 |
| Salvia_regla           | subgenus_calosphace_sensu_stricto | 0.441979522 |
| Salvia_sessei          | subgenus_calosphace_sensu_stricto | 0.441979522 |
| Salvia_cuspidata       | subgenus_calosphace_sensu_stricto | 0.441979522 |
| Salvia_flocculosa      | subgenus_calosphace_sensu_stricto | 0.441979522 |
| Salvia_bangii          | subgenus_calosphace_sensu_stricto | 0.441979522 |
| Salvia_gilliesii       | subgenus_calosphace_sensu_stricto | 0.441979522 |
| Salvia_calolophos      | subgenus_calosphace_sensu_stricto | 0.441979522 |
| Salvia_heerii          | subgenus_calosphace_sensu_stricto | 0.441979522 |
| Salvia_retinervia      | subgenus_calosphace_sensu_stricto | 0.441979522 |
| Salvia_ballotaeflora   | subgenus_calosphace_sensu_stricto | 0.441979522 |
| Salvia_pinguifolia     | subgenus_calosphace_sensu_stricto | 0.441979522 |
| Salvia_candicans       | subgenus_calosphace_sensu_stricto | 0.441979522 |
| Salvia_oaxacana        | subgenus_calosphace_sensu_stricto | 0.441979522 |
| Salvia_macrophylla     | subgenus_patens                   | 0.5         |
| Salvia_sagittata       | subgenus_patens                   | 0.5         |
| Salvia_scutellarioides | subgenus_patens                   | 0.5         |
| Salvia_cacaliifolia    | subgenus_patens                   | 0.5         |
| Salvia_patens          | subgenus_patens                   | 0.5         |
| Salvia_vitifolia       | subgenus_patens                   | 0.5         |
| Salvia_axillaris       | subgenus_patens                   | 0.5         |
