# Supplementary material for: Tracking temporal shifts in area, biomes, and pollinators in the radiation of Salvia (sages) across continents: leveraging anchored hybrid enrichment and targeted sequence data
Source: PubMed Central journal article supplement — Am J Bot. 2019 Apr 15;106(4):573–97. doi: 10.1002/ajb2.1268 (PMC6850103; doi:10.1002/ajb2.1268), 2019-04-15
Supplement: AJB2-106-573-s004.pdf [file AJB2-106-573-s004.pdf]

**Appendix S4.** BioGeoBEARS area: details regarding model development, temporal stratification, and dispersal probabilities among the geographical regions through time for BioGeoBEARS analyses of *Salvia*. See Appendix S2 for species coding.

*Time periods file*

5  
15  
37

*Areas allowed file:* S=South America, N=North America, M=Mediterranean, W=southwest Asia, R=northeast Africa/Arabia, A=south Africa, C=east Asia

| S | N | M | W | R | A | C |
|---|---|---|---|---|---|---|
| 1 | 1 | 1 | 1 | 1 | 1 | 1 |
| 1 | 1 | 1 | 1 | 1 | 1 | 1 |
| 1 | 1 | 1 | 1 | 1 | 1 | 1 |
| 1 | 1 | 1 | 1 | 1 | 1 | 1 |
| 1 | 1 | 1 | 1 | 1 | 1 | 1 |
| 1 | 1 | 1 | 1 | 1 | 1 | 1 |
| 1 | 1 | 1 | 1 | 1 | 1 | 1 |

| S | N | M | W | R | A | C |
|---|---|---|---|---|---|---|
| 1 | 1 | 1 | 1 | 1 | 1 | 1 |
| 1 | 1 | 1 | 1 | 1 | 1 | 1 |
| 1 | 1 | 1 | 1 | 1 | 1 | 1 |
| 1 | 1 | 1 | 1 | 1 | 1 | 1 |
| 1 | 1 | 1 | 1 | 1 | 1 | 1 |
| 1 | 1 | 1 | 1 | 1 | 1 | 1 |
| 1 | 1 | 1 | 1 | 1 | 1 | 1 |

| S | N | M | W | R | A | C |
|---|---|---|---|---|---|---|
| 1 | 1 | 1 | 1 | 1 | 1 | 1 |
| 1 | 1 | 1 | 1 | 1 | 1 | 1 |
| 1 | 1 | 1 | 1 | 1 | 1 | 1 |
| 1 | 1 | 1 | 1 | 1 | 1 | 1 |
| 1 | 1 | 1 | 1 | 1 | 1 | 1 |
| 1 | 1 | 1 | 1 | 1 | 1 | 1 |
| 1 | 1 | 1 | 1 | 1 | 1 | 1 |

END

*Manual dispersal probabilities file: S=South America, N=North America, M=Mediterranean, W=southwest Asia, R=northeast Africa/Arabia, A=south Africa, C=east Asia*

| S   | N   | M   | W   | R   | A   | C   |
|-----|-----|-----|-----|-----|-----|-----|
| 1   | 1   | 0.1 | 0.1 | 0.1 | 0.1 | 0.1 |
| 1   | 1   | 0.1 | 0.1 | 0.1 | 0.1 | 0.1 |
| 0.1 | 0.1 | 1   | 1   | 1   | 0.3 | 0.5 |
| 0.1 | 0.1 | 1   | 1   | 1   | 0.3 | 1   |
| 0.1 | 0.1 | 1   | 1   | 1   | 0.3 | 1   |
| 0.1 | 0.1 | 0.3 | 0.3 | 0.3 | 1   | 0.3 |
| 0.1 | 0.1 | 0.5 | 1   | 1   | 0.3 | 1   |

| S   | N   | M   | W   | R   | A   | C   |
|-----|-----|-----|-----|-----|-----|-----|
| 1   | 0.5 | 0.1 | 0.1 | 0.1 | 0.1 | 0.1 |
| 0.5 | 1   | 0.5 | 0.1 | 0.1 | 0.1 | 0.5 |
| 0.1 | 0.5 | 1   | 1   | 1   | 0.3 | 0.5 |
| 0.1 | 0.1 | 1   | 1   | 1   | 0.3 | 1   |
| 0.1 | 0.1 | 1   | 1   | 1   | 0.3 | 1   |
| 0.1 | 0.1 | 0.3 | 0.3 | 0.3 | 1   | 0.3 |
| 0.1 | 0.5 | 0.5 | 1   | 1   | 0.3 | 1   |

| S   | N   | M   | W   | R   | A   | C   |
|-----|-----|-----|-----|-----|-----|-----|
| 1   | 0.3 | 0.1 | 0.1 | 0.1 | 0.1 | 0.1 |
| 0.3 | 1   | 0.7 | 0.3 | 0.3 | 0.1 | 0.7 |
| 0.1 | 0.7 | 1   | 1   | 1   | 0.1 | 0.5 |
| 0.1 | 0.3 | 1   | 1   | 1   | 0.1 | 1   |
| 0.1 | 0.3 | 1   | 1   | 1   | 0.1 | 1   |
| 0.1 | 0.1 | 0.1 | 0.1 | 0.1 | 1   | 0.1 |
| 0.1 | 0.7 | 0.5 | 1   | 1   | 0.1 | 1   |

END
