# Supplementary material for: Tracking temporal shifts in area, biomes, and pollinators in the radiation of Salvia (sages) across continents: leveraging anchored hybrid enrichment and targeted sequence data
Source: PubMed Central journal article supplement — Am J Bot. 2019 Apr 15;106(4):573–97. doi: 10.1002/ajb2.1268 (PMC6850103; doi:10.1002/ajb2.1268), 2019-04-15
Supplement: AJB2-106-573-s005.pdf [file AJB2-106-573-s005.pdf]

**Appendix S5.** BioGeoBEARS biome: details regarding model development, temporal stratification, and dispersal probabilities among biomes through time for BioGeoBEARS analyses of *Salvia*. See Appendix S2 for species coding.

*Time periods file*

4  
14  
37

*Areas allowed file:* B=broadleaf forest, C=coniferous forest, D=desert, arid shrubland, G=grassland, M=Mediterranean

| B | C | D | G | M |
|---|---|---|---|---|
| 1 | 1 | 1 | 1 | 1 |
| 1 | 1 | 1 | 1 | 1 |
| 1 | 1 | 1 | 1 | 1 |
| 1 | 1 | 1 | 1 | 1 |
| 1 | 1 | 1 | 1 | 1 |

| B | C | D | G | M |
|---|---|---|---|---|
| 1 | 1 | 1 | 1 | 0 |
| 1 | 1 | 1 | 1 | 0 |
| 1 | 1 | 1 | 1 | 0 |
| 1 | 1 | 1 | 1 | 0 |
| 0 | 0 | 0 | 0 | 0 |

| B | C | D | G | M |
|---|---|---|---|---|
| 1 | 1 | 1 | 0 | 0 |
| 1 | 1 | 1 | 0 | 0 |
| 1 | 1 | 1 | 0 | 0 |
| 0 | 0 | 0 | 0 | 0 |
| 0 | 0 | 0 | 0 | 0 |

END

*Manual dispersal probabilities file:* B=broadleaf forest, C=coniferous forest, D=desert, arid shrubland, G=grassland, M=Mediterranean

| B     | C      | D     | G     | M      |
|-------|--------|-------|-------|--------|
| 1     | 1      | 0.069 | 0.310 | 0.069  |
| 1     | 1      | 0.276 | 0.103 | 0.0001 |
| 0.069 | 0.276  | 1     | 0.103 | 0.172  |
| 0.310 | 0.103  | 0.103 | 1     | 0.034  |
| 0.069 | 0.0001 | 0.172 | 0.034 | 1      |

| B     | C     | D     | G     | M |
|-------|-------|-------|-------|---|
| 1     | 1     | 0.069 | 0.310 | 0 |
| 1     | 1     | 0.276 | 0.103 | 0 |
| 0.069 | 0.276 | 1     | 0.103 | 0 |
| 0.310 | 0.103 | 0.103 | 1     | 0 |
| 0     | 0     | 0     | 0     | 0 |

| B     | C     | D     | G | M |
|-------|-------|-------|---|---|
| 1     | 1     | 0.069 | 0 | 0 |
| 1     | 1     | 0.276 | 0 | 0 |
| 0.069 | 0.276 | 1     | 0 | 0 |
| 0     | 0     | 0     | 0 | 0 |
| 0     | 0     | 0     | 0 | 0 |

END
