# Supplementary material for: Tracking temporal shifts in area, biomes, and pollinators in the radiation of Salvia (sages) across continents: leveraging anchored hybrid enrichment and targeted sequence data
Source: PubMed Central journal article supplement — Am J Bot. 2019 Apr 15;106(4):573–97. doi: 10.1002/ajb2.1268 (PMC6850103; doi:10.1002/ajb2.1268), 2019-04-15

**Appendix S6.** RAxML tree of Anchored Hybrid Enrichment genomic data based on 316 concatenated nuclear genes across 35 species of *Salvia* and five outgroup genera in the tribe Mentheae. Bootstrap support values are provided next to each node. Asterisks indicate clades that are designated as monophyletic in the BEAST analyses of 528 species based on nrDNA. Edges are colored by subgenus (see Table 1). (The informal “*Heterosphace*” is used here and includes New World “*Salviastrum*” and Old World “*Verticillata*” and their relatives). See Fig. 2 for ASTRAL II coalescent bootstrap tree based on Anchored Hybrid Enrichment genomic data.

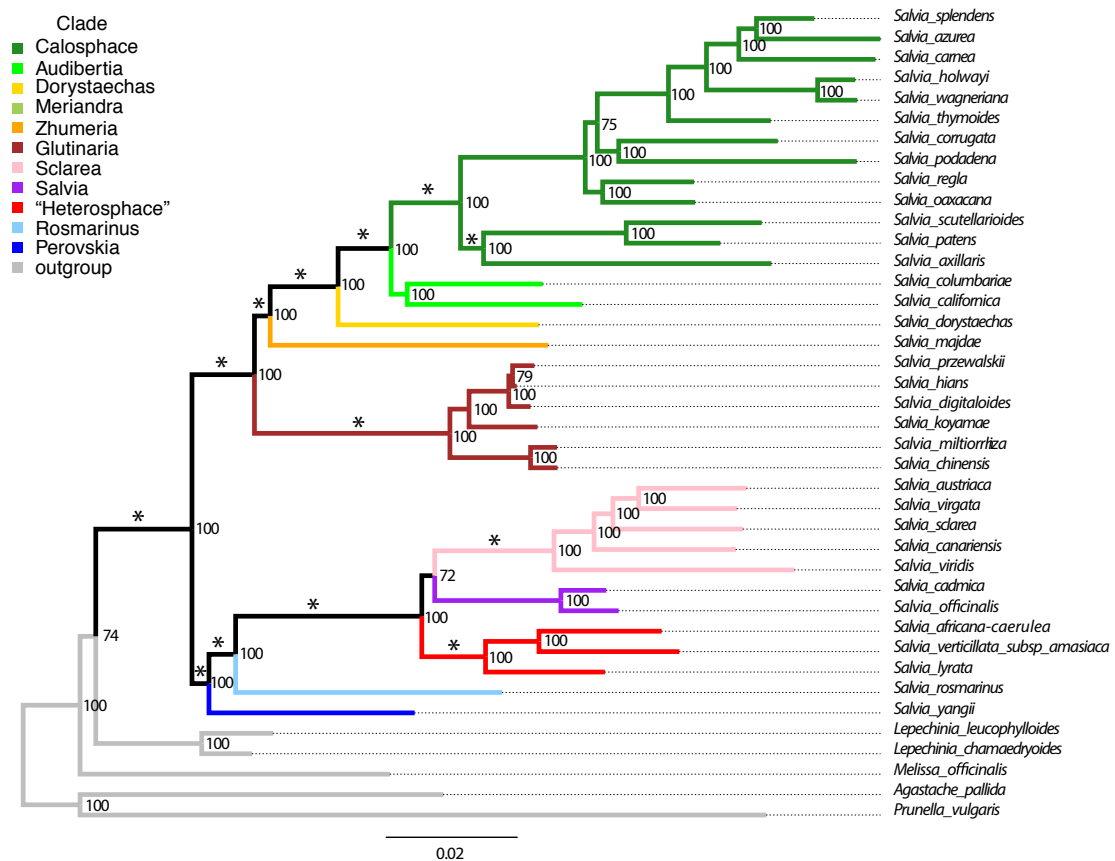

Supplement: AJB2-106-573-s006.pdf [file AJB2-106-573-s006.pdf]
