# Supplementary material for: Tracking temporal shifts in area, biomes, and pollinators in the radiation of Salvia (sages) across continents: leveraging anchored hybrid enrichment and targeted sequence data
Source: PubMed Central journal article supplement — Am J Bot. 2019 Apr 15;106(4):573–97. doi: 10.1002/ajb2.1268 (PMC6850103; doi:10.1002/ajb2.1268), 2019-04-15

**Appendix S7.** RAxML bootstrap (500 replicate) tree of 528 taxa of *Salvia* and two outgroup genera based on analysis of nrDNA ITS/ETS only (provided no topological constraints).

Phylogram showing all species tips, their major subgeneric clades designations, and RAxML bootstrap values for each branch. Relationships among major clades are not completely congruent with those based on Anchored Hybrid Enrichment genomic data (see Fig. 2, Appendix Figure S6).



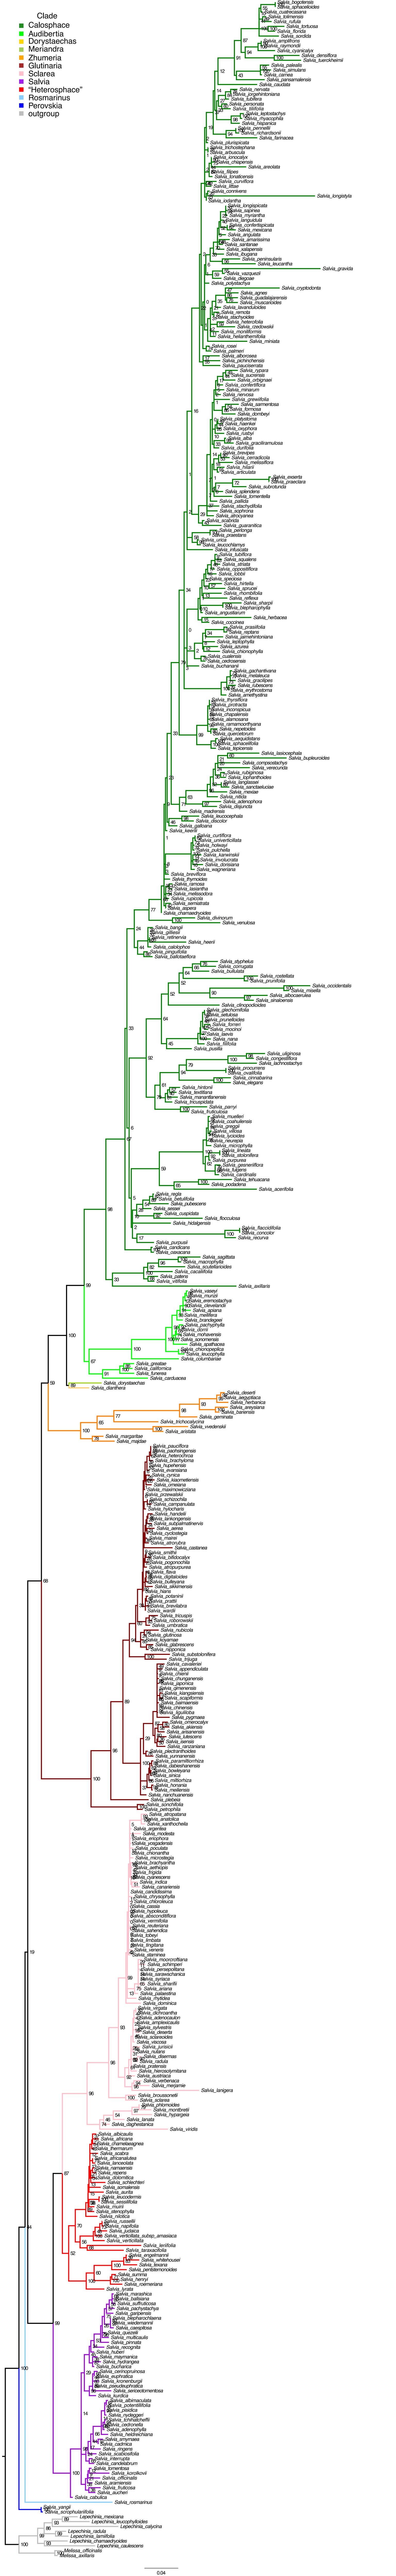

Supplement: AJB2-106-573-s007.pdf [file AJB2-106-573-s007.pdf]
