# Supplementary material for: Tracking temporal shifts in area, biomes, and pollinators in the radiation of Salvia (sages) across continents: leveraging anchored hybrid enrichment and targeted sequence data
Source: PubMed Central journal article supplement — Am J Bot. 2019 Apr 15;106(4):573–97. doi: 10.1002/ajb2.1268 (PMC6850103; doi:10.1002/ajb2.1268), 2019-04-15
Supplement: AJB2-106-573-s008.pdf [file AJB2-106-573-s008.pdf]

**Appendix S8.** BEAST Maximum Clade Credibility tree (yule model) using *Salvia* nrDNA and rooted with a monophyletic outgroup of *Lepechinia* and *Melissa*. Major clades that were well-supported based on AHE genomic data (see Fig. 2) were used as topological constraints in BEAST. This tree is same as shown in Fig. 4 but with species terminals and 95% nodal age intervals provided.
