# Supplementary material for: Tracking temporal shifts in area, biomes, and pollinators in the radiation of Salvia (sages) across continents: leveraging anchored hybrid enrichment and targeted sequence data
Source: PubMed Central journal article supplement — Am J Bot. 2019 Apr 15;106(4):573–97. doi: 10.1002/ajb2.1268 (PMC6850103; doi:10.1002/ajb2.1268), 2019-04-15

**Appendix S9.** The PCoA 1 and 2 distribution of 1000 PP BEAST trees from *Salvia* nrDNA and the 10 identified grove tree sets (and the MCC tree from Figure 3 and Appendix Figure S8) from Treespace analysis (Kendall, M., and C. Colijn. 2016. *Mapping phylogenetic trees to reveal distinct patterns of evolution. Molecular Biology and Evolution* 33: 2735–2743).

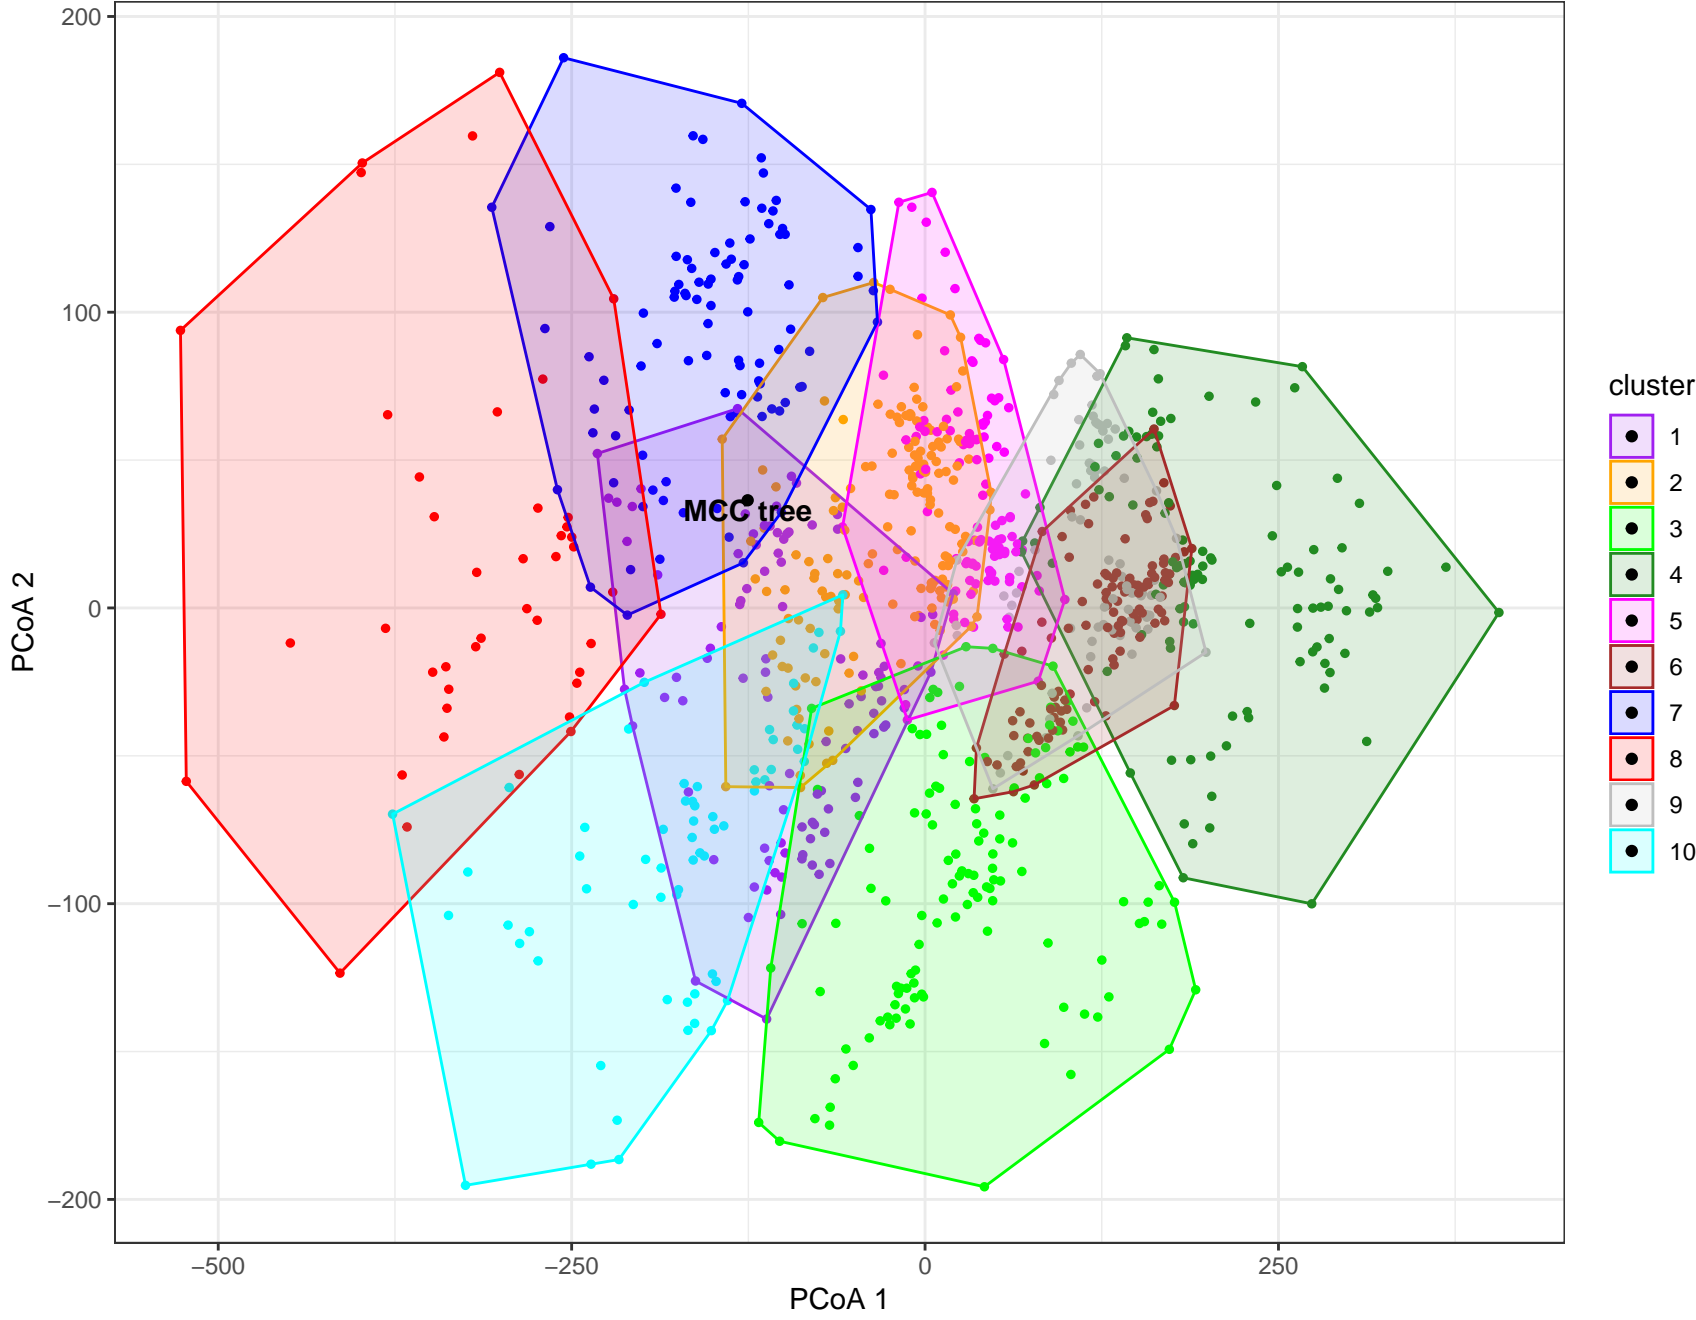

Supplement: AJB2-106-573-s009.pdf [file AJB2-106-573-s009.pdf]
